# Supplementary material for: Noninflammatory Changes of Microglia Are Sufficient to Cause Epilepsy
Source: PubMed Central journal article supplement — Cell Rep. Author manuscript; Available in PMC 2018 Apr 2. (PMC5880308; doi:10.1016/j.celrep.2018.02.004), 2018-02-20
Supplement: NIHMS947891-supplement-2.pdf [file NIHMS947891-supplement-2.pdf]

## Noninflammatory Changes of Microglia Are Sufficient to Cause Epilepsy

### Graphical Abstract

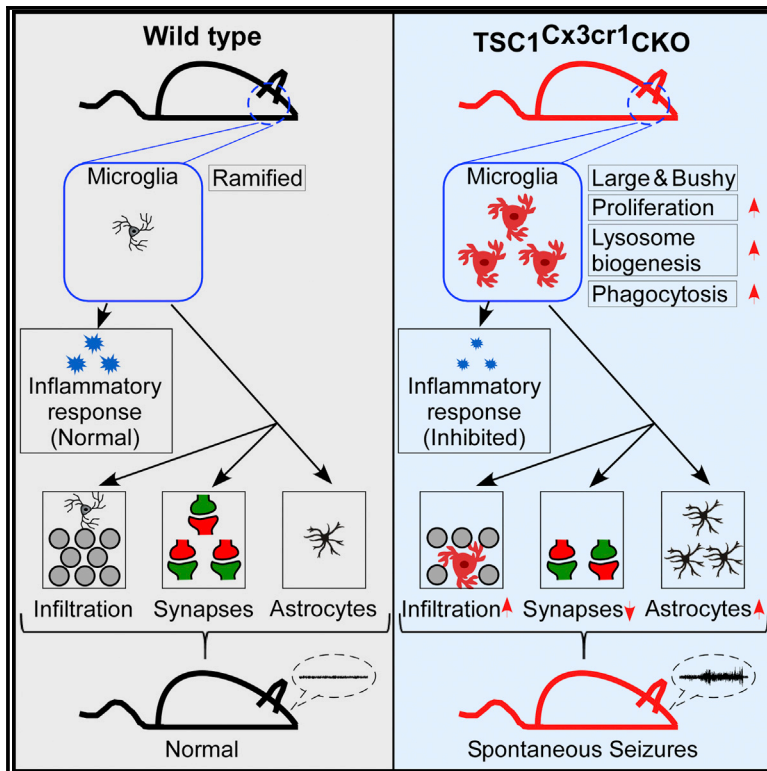

### Authors

Xiaofeng Zhao, Yuan Liao, Shannon Morgan, ..., Michael Gruenthal, Xinjun Zhu, Yunfei Huang

### Correspondence

huangy@amc.edu

### In Brief

Zhao et al. reveal that elevated mTOR signaling in microglia propels the cells to acquire a noninflammatory reactive-like phenotype, which leads to disruption of CNS homeostasis. The authors also report that reactive-like microglia promote epileptogenesis independent of the inflammatory response.

### Highlights

- Microglia adopt a noninflammatory reactive-like phenotype upon mTOR activation
- Elevation of microglial mTOR activity triggers marked proliferation of astrocytes
- Reactive-like microglia drive epileptogenesis independent of inflammatory responses

### Data and Software Availability

GSE108625

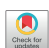

# Noninflammatory Changes of Microglia Are Sufficient to Cause Epilepsy

Xiaofeng Zhao,<sup>1</sup> Yuan Liao,<sup>2</sup> Shannon Morgan,<sup>1</sup> Ramkumar Mathur,<sup>2</sup> Paul Feustel,<sup>1</sup> Joseph Mazurkiewicz,<sup>1</sup> Jiang Qian,<sup>3</sup> Julia Chang,<sup>4</sup> Gary W. Mathern,<sup>4</sup> Matthew A. Adamo,<sup>5</sup> Anthony L. Ritaccio,<sup>6</sup> Michael Gruenthal,<sup>6</sup> Xinjun Zhu,<sup>2,7</sup> and Yunfei Huang<sup>1,8,\*</sup>

<sup>1</sup>Department of Neuroscience and Experimental Therapeutics, Albany Medical College, Albany, NY 12208, USA

<sup>2</sup>Department of Molecular and Cellular Physiology, Albany Medical College, Albany, NY 12208, USA

<sup>3</sup>Department of Pathology, Albany Medical College, Albany, NY 12208, USA

<sup>4</sup>Department of Neurosurgery, Brain Research Institute, University of California, Los Angeles, Los Angeles, CA 90095, USA

<sup>5</sup>Department of Neurosurgery, Albany Medical College, Albany, NY 12208, USA

<sup>6</sup>Department of Neurology, Albany Medical College, Albany, NY 12208, USA

<sup>7</sup>Department of Medicine, Albany Medical College, Albany, NY 12208, USA

<sup>8</sup>Lead Contact

\*Correspondence: [huangy@amc.edu](mailto:huangy@amc.edu)

<https://doi.org/10.1016/j.celrep.2018.02.004>

## SUMMARY

Microglia are well known to play a critical role in maintaining brain homeostasis. However, their role in epileptogenesis has yet to be determined. Here, we demonstrate that elevated mTOR signaling in mouse microglia leads to phenotypic changes, including an amoeboid-like morphology, increased proliferation, and robust phagocytosis activity, but without a significant induction of pro-inflammatory cytokines. We further provide evidence that these noninflammatory changes in microglia disrupt homeostasis of the CNS, leading to reduced synapse density, marked microglial infiltration into hippocampal pyramidal layers, moderate neuronal degeneration, and massive proliferation of astrocytes. Moreover, the mice thus affected develop severe early-onset spontaneous recurrent seizures (SRSS). Therefore, we have revealed an epileptogenic mechanism that is independent of the microglial inflammatory response. Our data suggest that microglia could be an opportune target for epilepsy prevention.

## INTRODUCTION

Epileptogenesis is the process by which a normal brain becomes prone to develop spontaneous recurrent seizures. It typically develops following diverse brain insults or pathological changes such as those caused by brain injury or genetic mutation (e.g., in tuberous sclerosis complex [TSC] genes) (Pitkänen and Lukasiuk, 2011). There is increasing evidence to suggest that microglia may play a role in epileptogenesis (Abraham et al., 2012; Boer et al., 2006; Liu et al., 2014; Sosunov et al., 2012; van Vliet et al., 2012; Zhang et al., 2016). For example, morphologically reactive microglia have been found in the brains of animal models of temporal lobe epilepsy (TLE) (van Vliet et al., 2012) and in surgical resections of epilepsy patients (Liu et al., 2014;

Sosunov et al., 2012). Microglia are the main innate immune cells in the CNS and the principal producer of pro-inflammatory cytokines in response to brain injury (Colonna and Butovsky, 2017). Their pro-inflammatory action is postulated to be the etiologic driver of epileptogenesis (Abraham et al., 2012; Aronica et al., 2017; Colonna and Butovsky, 2017).

Apart from being inflammatory mediators, microglia also play a critical role in maintaining CNS homeostasis (Colonna and Butovsky, 2017; Hong et al., 2016; Nimmerjahn et al., 2005). They reside nearly uniformly throughout the entire brain. Their extensive ramifying morphology ensures maximal contacts with neurons for synaptic pruning and clearance of dying cells and debris during brain development and under pathological conditions (Abiega et al., 2016; Nimmerjahn et al., 2005; Schafer et al., 2012; Sierra et al., 2010); thus, microglia are ideally positioned for surveilling and maintaining homeostasis of the CNS. Their homeostatic action has also been implicated in learning and memory in the normal brain (Parkhurst et al., 2013). When a brain is injured, microglia migrate to the site of damage to engulf and eliminate dead cells and debris. They become hyper-proliferated and undergo a morphological change (process shortening), which affects the contacts they make with neurons and non-neuronal cells; consequently, their synaptic surveillance and homeostatic functions are expected to be altered. However, it is not known whether such altered noninflammatory homeostatic changes of microglia contribute to epileptogenesis.

Elevated mTOR signaling is epileptogenic in human TSC and in several other animal models (Crino, 2016). Some focal epilepsies are closely associated with somatic mutations that lead to increased mTOR activity (Jansen et al., 2015). Previous studies have been mainly focused on neurons and astrocytes (Crino, 2016; McMahon et al., 2012; Zhang et al., 2016). It remains unclear if microglial mTOR signaling plays any role in epileptogenesis. mTOR signaling in microglia is elevated in the brains of patients with epilepsy (Liu et al., 2014; Sosunov et al., 2012), pointing to a potential role for mTOR signaling in microglial regulation and epileptogenesis. TSC is a negative regulator of the mTOR pathway (Kwiatkowski et al., 2002); genetic deletion of *TSC1* leads to hyperactivation of mTOR. Accordingly, we

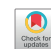

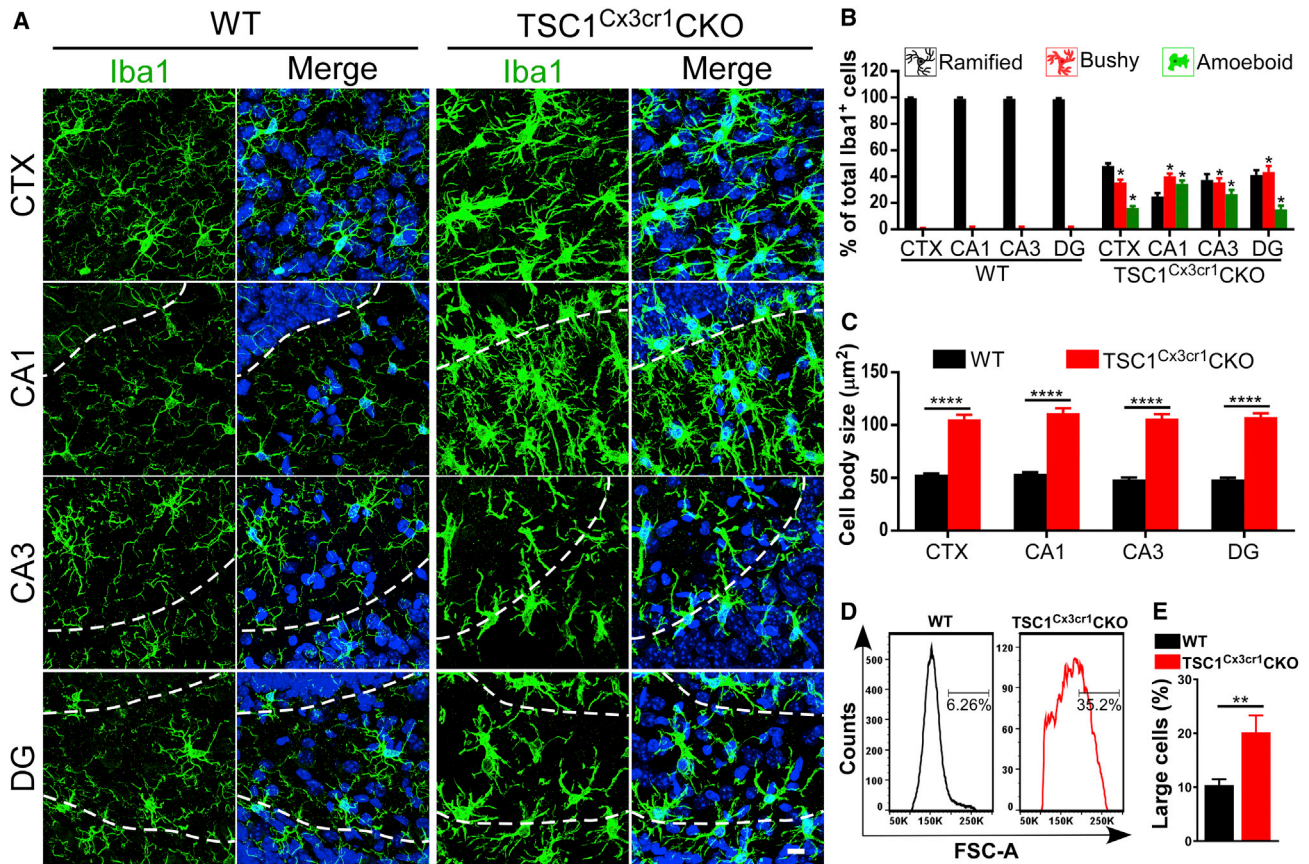

**Figure 1. Reactive-like Morphology of Microglia in *TSC1<sup>Cx3cr1</sup>CKO* Mice**

(A) Confocal images acquired from cortex (CTX), hippocampal CA1 and CA3, and the dentate gyrus (DG) of *Cx3cr1-cre* (hereafter referred to as wild-type [WT]) and *TSC1<sup>Cx3cr1</sup>CKO* mouse brains. Dashed lines indicate the borders of the CA1 and CA3 pyramidal layers and the dentate granular layers. Scale bar, 10 μm. (B) Percentage of microglia displaying a ramified, bushy, or amoeboid morphology in the CTX and hippocampus of WT (n = 6; 3 males and 3 females) and *TSC1<sup>Cx3cr1</sup>CKO* (n = 7; 3 males and 4 females) mice. (C) Quantification of microglial cell-body size in WT (n = 6; 3 males and 3 females) and *TSC1<sup>Cx3cr1</sup>CKO* (n = 6; 3 males and 3 females) mice. (D) FACS analysis of cell sizes of microglia (gated as CD11b<sup>+</sup>/CD45<sup>low & Int</sup>) in WT and *TSC1<sup>Cx3cr1</sup>CKO* mice. (E) Quantification of the population of microglia with larger cell sizes in WT (n = 4; 2 males and 2 females) and *TSC1<sup>Cx3cr1</sup>CKO* (n = 4; 2 males and 2 females) mice. Data are presented as mean ± SEM t test. \*p < 0.05, \*\*p < 0.01, and \*\*\*p < 0.0001. See also Figure S1.

employed mice with restrictive deletion of *TSC1* to model mTOR activation in microglia. Our hypothesis is that perturbation of microglial homeostatic activity drives epileptogenesis.

## RESULTS

### Elevated mTOR Signaling Changes Microglia Morphology

Immunohistological analysis revealed an increased number of microglia positively stained for phosphorylated s6 in brain tissue obtained from epilepsy surgery (Figure S1A). This finding verifies that mTOR signaling in microglia is upregulated in the epileptic brain (Liu et al., 2014; Sosunov et al., 2012). To elevate mTOR signaling selectively in microglia, we generated *TSC1<sup>Cx3cr1</sup>CKO* mice by crossing *TSC1<sup>lox/lox</sup>* mice (Kwiatkowski et al., 2002; McMahon et al., 2012) with a *Cx3CR1-cre* mouse line. The *Cx3CR1-cre* line drove the expression of Cre recombinase specifically in mouse microglia, as indicated by Tomato fluorescent

signal in microglial cells in the brains of *Tomato<sup>fl/fl</sup>/Cx3CR1-cre* mice (Figure S1B). In *TSC1<sup>Cx3cr1</sup>CKO* mice, *TSC1* was deleted in microglia, resulting in increased levels of pS6 (Figures S1C and S1D), which reflects the activation of mTOR (Kwiatkowski et al., 2002; McMahon et al., 2012). The ramified morphology of microglia facilitates their contact with neurons and non-neuronal cells (Nimmerjahn et al., 2005) and is therefore critical for CNS homeostasis. Accordingly, we set out to evaluate whether elevated mTOR signaling alters the morphology of microglia. In contrast to the ramified morphology of microglia seen in *Cx3CR1-cre* control mouse brain, the microglia in *TSC1<sup>Cx3cr1</sup>CKO* mice adopted a bushy or amoeboid-like morphology resembling the microglial reactive-like phenotype (Figures 1A–1C, S1E, and S1F). The microglia became less ramified, displaying an enlarged cell body and short processes with less branching. Fluorescence-activated cell sorting (FACS) analysis confirmed that cells of the microglial population were enlarged in *TSC1<sup>Cx3cr1</sup>CKO* mice (Figures 1D, 1E, and S1G).

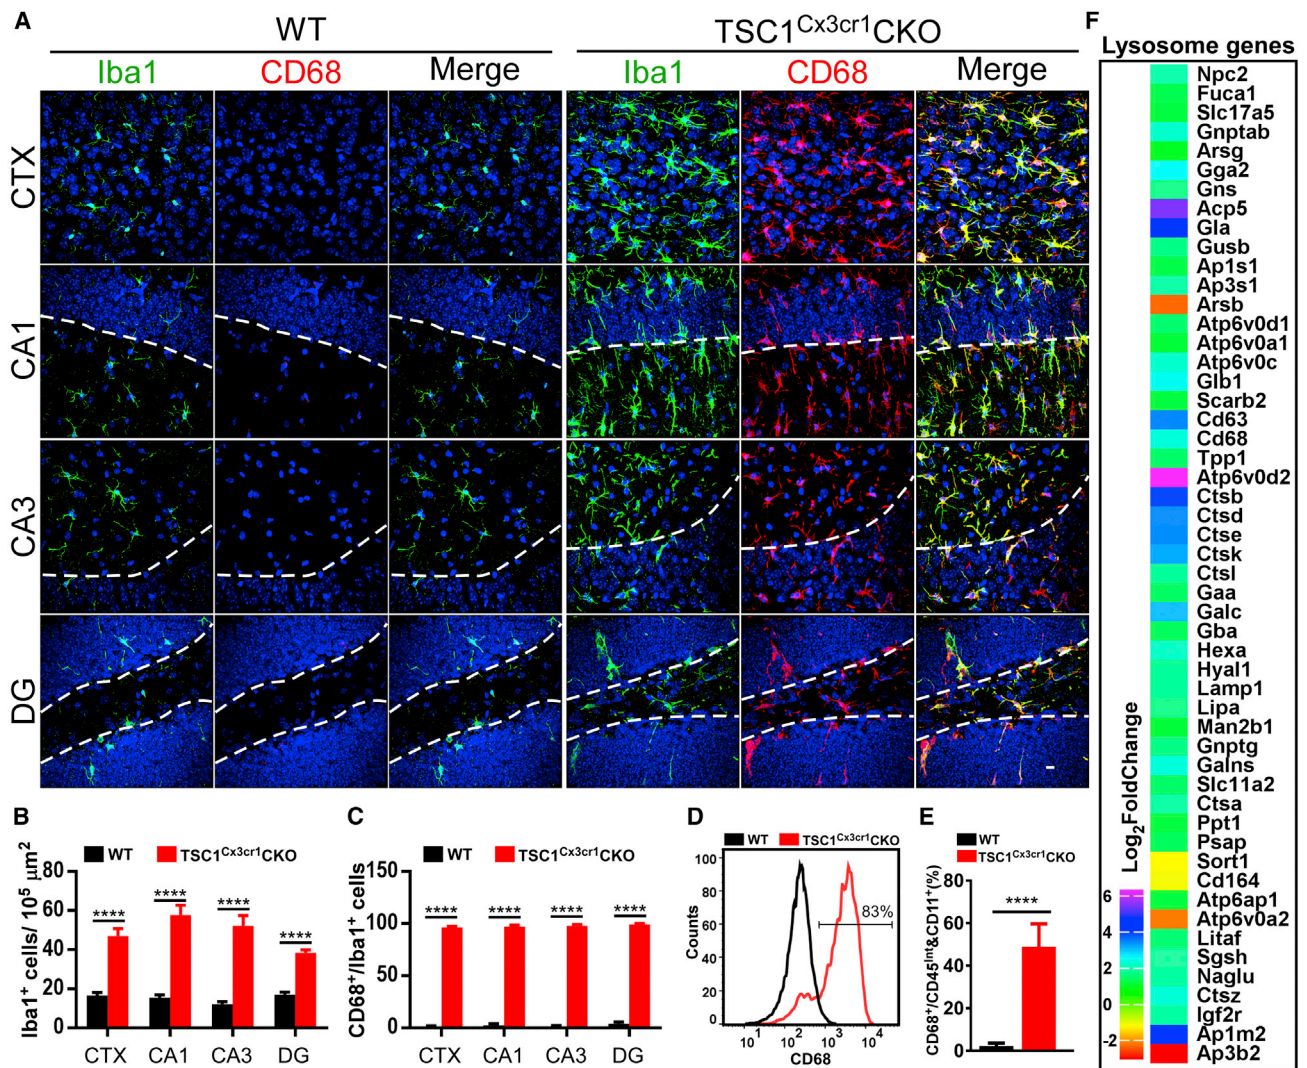

Thus, our data suggest that microglia adopt a reactive-like morphology in the brain when mTOR signaling is activated.

**Elevated mTOR Signaling Increases Microglia Proliferation and Expression of Lysosome Genes**

Microglia reside almost uniformly throughout the brain, with some regional differences. We observed that microglia proliferated extensively throughout the entire brain of *TSC1<sup>CX3CR1</sup>CKO* mice, with a 3- to 6-fold increase in the cortex and hippocampus (Figures 2A, 2B, and S2A). Moreover, they also lost the uniform distribution pattern, instead forming patches in both the cortex

and hippocampus. These data suggest that elevated mTOR signaling promotes the proliferation of microglia. We also performed FACS analysis of monocytes in control and *TSC1<sup>CX3CR1</sup>CKO* mouse brains. Monocytes were gated as CD45<sup>+</sup>/CD11b<sup>+</sup>/Cx3cr1<sup>+</sup>/Ly6C<sup>+</sup> or CD45<sup>+</sup>/CD11b<sup>+</sup>/Cx3cr1<sup>+</sup>/CCR2<sup>+</sup> (Figures S2B and S2C). We found ~1.7% of Cx3cr1-positive cells to be CD45<sup>+</sup>/CD11b<sup>+</sup>/Cx3cr1<sup>+</sup>/Ly6C<sup>+</sup> and less than 1% to be CD45<sup>+</sup>/CD11b<sup>+</sup>/Cx3cr1<sup>+</sup>/CCR2<sup>+</sup> in both control and *TSC1<sup>CX3CR1</sup>CKO* mouse brains. Thus, there is no significant difference in either cell population between control and *TSC1<sup>CX3CR1</sup>CKO* mice.

CD68 is a lysosomal protein that is upregulated in microglia in the brains of individuals with epilepsy and in animal models (Boer et al., 2006; Sosunov et al., 2012; van Vliet et al., 2012). It is frequently used as a marker for reactive microglia. We observed marked elevation of CD68 expression in morphologically altered microglia throughout the entire brain (Figures 2A, 2C, and S2A). FACS analysis revealed a CD68-positive population of microglia (CD45<sup>low&Int</sup>/CD11b<sup>+</sup>/Cx3cr1<sup>+</sup>/CD68<sup>+</sup>) in *TSC1*<sup>CX3CR1</sup>CKO mice (Figures 2D and 2E). We used iPathwayGuider (Advaita) to perform RNA-sequencing (RNA-seq) analysis of lysosome genes in microglia purified from control and *TSC1*<sup>Cx3cr1</sup>CKO mouse brains (Figures S5B–S5E). We found that the expression of 54 genes was significantly altered in *TSC1*<sup>CX3CR1</sup>CKO microglia (Figure 2F). Notably, most genes (49 of 54) were upregulated, whereas only 5 genes were downregulated. This suggests that *TSC1*<sup>CX3CR1</sup>CKO microglia undergo a functional adaptation, resembling the increased lysosomal biogenesis observed in activated microglia (Tanaka et al., 2013).

### Elevated mTOR Signaling Promotes Phagocytosis

Microglia exhibit phagocytotic activity under both quiescent and reactive states, which is critical in synapse pruning and removal of dead neurons (Nimmerjahn et al., 2005; Schafer et al., 2012; Sierra et al., 2010). Accordingly, we evaluated phagocytotic activity in the brains of *TSC1*<sup>Cx3cr1</sup>CKO mice. We employed caspase-3 staining to detect early dying neurons in *TSC1*<sup>CX3CR1</sup>CKO brain. We observed increased numbers of caspase-3-positive neurons in the cortex and hippocampus of *TSC1*<sup>CX3CR1</sup>CKO mice compared to wild-type mouse brain (Figures 3A, S3A, and S3B). Approximately 50% of the caspase-3 positive neurons in the hippocampus showed direct contact with microglial cells, forming a characteristic phagocytotic cup (Abiega et al., 2016; Sierra et al., 2010), whereas such contacts and cups were much less abundant in wild-type mouse brain (Figures 3B and 3E). These data strongly indicate that microglia with elevated mTOR signaling can effectively phagocytose dying neurons in mouse brain.

To better evaluate microglial phagocytosis, we performed an *in vivo* phagocytosis assay using zymosan bioparticles (Preissler et al., 2015). We injected fluorescein isothiocyanate (FITC)-labeled zymosan particles or vehicle into the hippocampus. Microglia were isolated from the brains of control and *TSC1*<sup>CX3CR1</sup>CKO mice 16 hr after injection (Figures 3C, 3F, and S3C–S3F). Microglia were identified as a population of Cx3cr1<sup>+</sup>/CD11b<sup>+</sup>/CD45<sup>low&Int</sup> by FACS analysis (Figures 3C, S3C, and S3D). We found a significant elevation of phagocytosis of FITC-labeled zymosan particles by microglia in brains of *TSC1*<sup>CX3CR1</sup>CKO mice as compared to control brains.

We next evaluated phagocytosis in cultured microglia by using pHrodo-labeled zymosan particles, which are conjugated to the pH-sensitive indicator pHrodo green (Figures 3D, 3G, and 3H). This indicator maintains a non-fluorescent state at neutral pH but becomes bright green under acidic conditions (i.e., in phagosomes). Real-time imaging of microglia phagocytosis *in vitro* revealed that the microglia prepared from *TSC1*<sup>CX3CR1</sup>CKO mice began to show green fluorescent punctae within 5 min, whereas it took 10–15 min for control microglia to show zymosan particle uptake (Figures 3D and 3G). Moreover, *TSC1*<sup>CX3CR1</sup>CKO micro-

glia displayed a more robust uptake of pHrodo-labeled zymosan particles, 2- to 3-fold, compared to wild-type microglia (Figures 3H and S3G). Together, our data from both *in vitro* and *in vivo* studies suggest that elevated mTOR signaling increases phagocytosis by microglia. Analysis of RNA-seq data revealed significant changes in expression of a large set of genes directly or indirectly involved in phagocytosis (Figures 3I–3K). Notably, *Colec12*, *C2*, *Pparg*, *Igkc*, *Iglc2*, and *Gsn* were markedly upregulated, whereas *CD209*, *Ighm*, *Siglece*, *Pld4*, *Rab39*, and *Alox5* were greatly downregulated. Changes in expression of genes in phagocytosis pathways are consistent with altered phagocytosis activity observed in *TSC1*<sup>CX3CR1</sup>CKO microglia.

### Elevated mTOR Signaling Suppresses the Microglial Inflammatory Response

Microglia are considered as resident macrophages, mediating the innate immune response and producing pro-inflammatory cytokines/mediators when encountering an injury signal. Accordingly, we evaluated pro-inflammatory cytokine/mediator profiles in *TSC1*<sup>Cx3cr1</sup>CKO mouse brains. We observed a moderate induction of tumor necrosis  $\alpha$  (*TNF- $\alpha$* ), interleukin 1 $\beta$  (*IL-1 $\beta$* ), interferon  $\beta$  (*IFN- $\beta$* ), and *iNOS* in *TSC1*<sup>Cx3cr1</sup>CKO mouse brains (Figure 4A). However, this induction predominately occurred in the hippocampus, with little induction in the cortex (Figure 4A). Hippocampal-specific induction of cytokines is intriguing because it suggests that the elevated levels of cytokines/mediators observed in *TSC1*<sup>Cx3cr1</sup>CKO mouse brain could be from cells other than microglia, i.e., neurons and astrocytes in the hippocampus. Accordingly, we performed transcriptome analysis of cytokines, chemokines, and other inflammatory mediators (Figures 4D–4H). Microglia in control mouse brains express moderate levels of *IL-1a*, *IL-16*, *Ccl3*, *Ccl4*, *Ccl6*, *Cxcl16*, *Tgfa*, *Tgfb1*, *Hmgb1*, *Cox1*, and *Mmp2*, and low but detectable levels of *IL-15*, *IL-18*, *IL-1b*, *Ccl2*, *Ccl9*, *Ccl12*, *Tnf*, *Cox411*, *Cox6a1*, *Cox6b1*, *Cox6c*, *Cox8a*, *Mmp8*, *Mmp9*, *Mmp12*, and *Mmp14*. In *TSC1*<sup>Cx3cr1</sup>CKO microglia, the expression of these genes, in general, was either downregulated or very moderate increased; only *Cxcl16* was greatly induced. *Cxcl16* is a transmembrane chemokine that regulates interaction among neurons, microglia, and astrocytes (Rosito et al., 2014). There was no significant induction of genes that are known to be highly expressed in activated microglia, including *IL-1a*, *IL-1b*, *IL-6*, *Tgfb1*, *Nos 2* (*iNOS*), *Hmgb1*, *Cox2*, *Mmp2*, and *Mmp8*. There was only a moderate increase in *TNF- $\alpha$*  expression (by 0.7 log<sub>2</sub>-fold change). However, real-time qPCR analysis of key pro-inflammatory cytokines or mediators using the same RNA preparations confirmed that there was no significant induction of pro-inflammatory cytokines (Figure 4B). The levels of *IL-1 $\beta$* , *iNOS*, and *IFN- $\beta$*  were moderately reduced in microglia of *TSC1*<sup>Cx3cr1</sup>CKO mice when compared with microglia from control mice (Figure 4B). These data suggest that microglia are not the main sources of *TNF- $\alpha$* , *IL-1 $\beta$* , *IFN- $\beta$* , and *iNOS* in *TSC1*<sup>CX3CR1</sup>CKO mouse brains.

To further clarify the role of mTOR signaling in the microglial inflammatory response, we treated cultured microglia with DNA fragments, which models the innate immune response when microglia phagocytose DNAs from microorganisms or dying cells (Matsuda et al., 2015). DNA treatment stimulated a robust pro-inflammatory response in control microglia, as reflected by

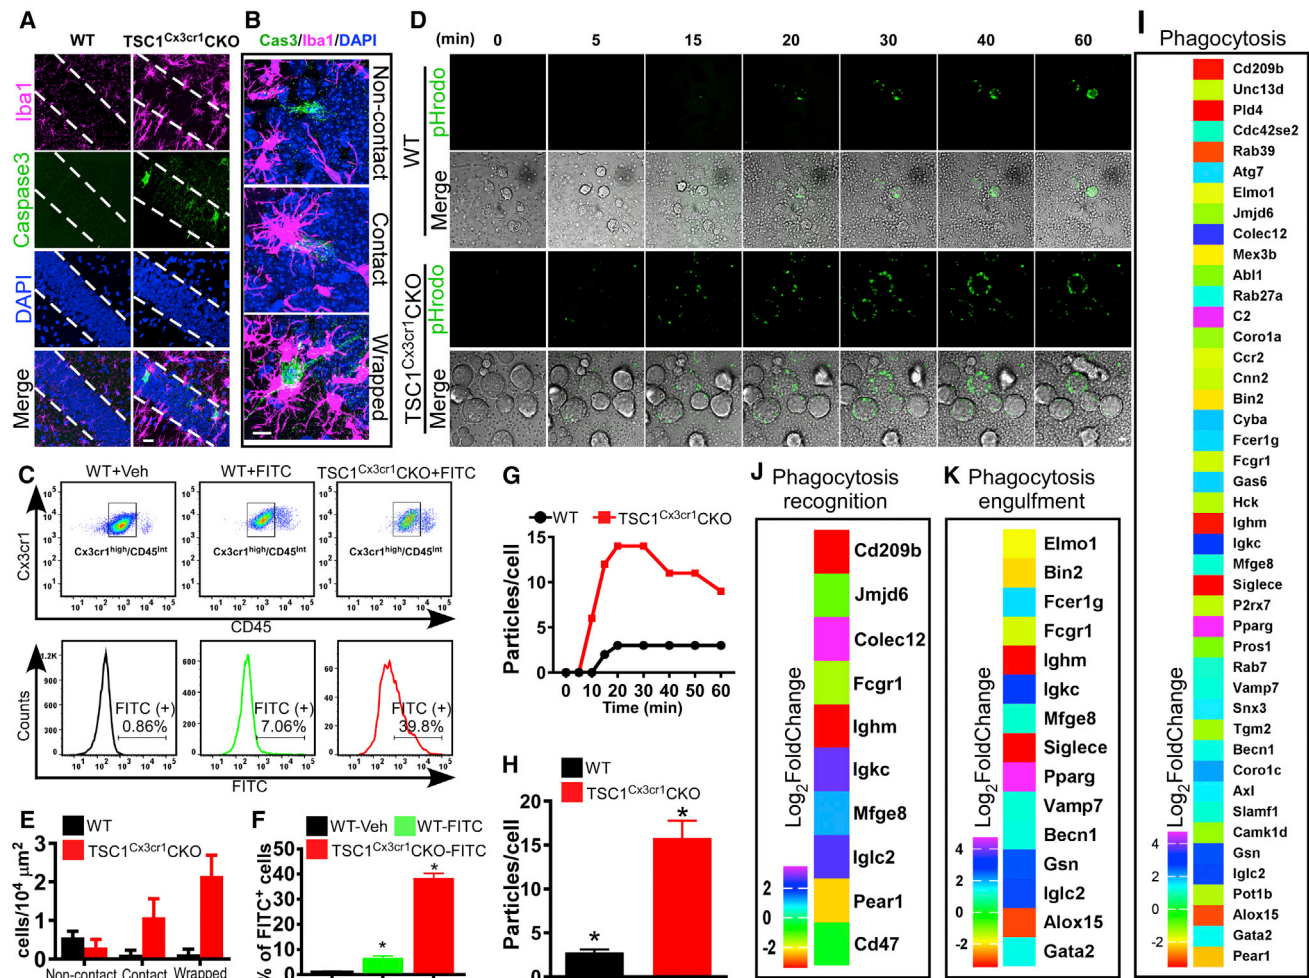

**Figure 3. TSC1<sup>Cx3cr1</sup>CKO Microglia Display Increased Phagocytosis Activity**

(A) Dying neurons in hippocampal CA1 in TSC1<sup>Cx3cr1</sup>CKO mice were identified by anti-activated caspase-3 antibody. Scale bar, 20 μm.  
 (B) Representative high-magnification images showing that dying (activated caspase-3 positive) neurons were isolated, had brief contact with a microglial cell, or were enwrapped by a microglia. Scale bar, 10 μm.  
 (C) FACS analysis of *in vivo* phagocytosis of FITC-labeled zymosan particles. The microglial population was identified as CD11b<sup>+</sup>/Cx3Ce1<sup>high</sup>/CD45<sup>low/int</sup> cells.  
 (D) Representative images from *in vitro* live-imaging of microglia phagocytosis of pHrodo Green zymosan bioparticles. Scale bar, 10 μm.  
 (E) Quantification of activated caspase-3-positive neurons in CA1 that fall within one of three categories: non-contact, contact, and wrapped. Data were averaged from WT (n = 6; 3 males, 3 females) and TSC1<sup>Cx3cr1</sup>CKO mice (n = 7; 3 males and 4 females).  
 (F) Quantification of FITC-positive microglia in the groups of WT- Vehicle (n = 3; 1 male and 2 females), WT- FITC (n = 3; 2 males and 1 female), and TSC1<sup>Cx3cr1</sup>CKO-FITC (n = 3; 1 male and 2 females) mice.  
 (G) Representative time course showing the number of phagocytic bioparticles over time.  
 (H) Average particles per microglia at the 30-min time point (n = 4–6). Data are presented as mean ± SEM (t test). \*p < 0.05. See also Figure S3.  
 (I–K) Analysis of RNA-seq data revealed changes in expression of genes implicated in phagocytosis (I), phagocytosis recognition (J), and phagocytosis engulfment (K) in TSC1<sup>Cx3cr1</sup>CKO microglia (log<sub>2</sub>-fold change compared to control). p values (padj) < 0.05.

robust induction of *TNF-α*, *IL-1β*, *IFN-β*, and *iNOS*; in contrast, the response of microglia prepared from TSC1<sup>Cx3cr1</sup>CKO mice was markedly diminished, except in the case of *TNF-α* induction, for which there was a moderate reduction (Figure 4C). Thus, the *in vitro* data are generally consistent with the data obtained for microglia purified from TSC1<sup>Cx3cr1</sup>CKO mouse brain.

We also analyzed the receptors involved in inflammatory/innate immune responses (Figures S4A–S4F). Microglia express very high levels of *IL-10ra*, *Ccr5*, *Tlr7*, *Tgfb1r*, *lfngr1*,

*Trem2*, and *Cx3cr1* and moderate or detectable levels of *IL-10rb*, *IL-4ra*, *IL-6ra*, *IL-13ra1*, *IL-17ra*, *IL-21ra*, *Ccr1*, *Ccr12*, *Tlr2*, *Tlr4*, *Tlr13*, *Tgfb2r*, *lfngr1*, *Tnfrsf1b*, *Tnfrsf21*, and *lfngr2*. Several receptors were greatly upregulated in TSC1<sup>Cx3cr1</sup>CKO microglia, including *Il2rg*, *Il3ra*, *Il12rb2*, *Cxcr1*, *Cxcr4*, *Tlr8*, and *Tnfrsf10b*, while others were markedly downregulated, including *Il7r1*, *Ccr5*, *Tlr5*, *Tlr9*, *TREM2*, and *Cx3cr1*. However, TSC1<sup>Cx3cr1</sup>CKO microglia remain to express a significant amount of Cx3cr1 proteins because they can be

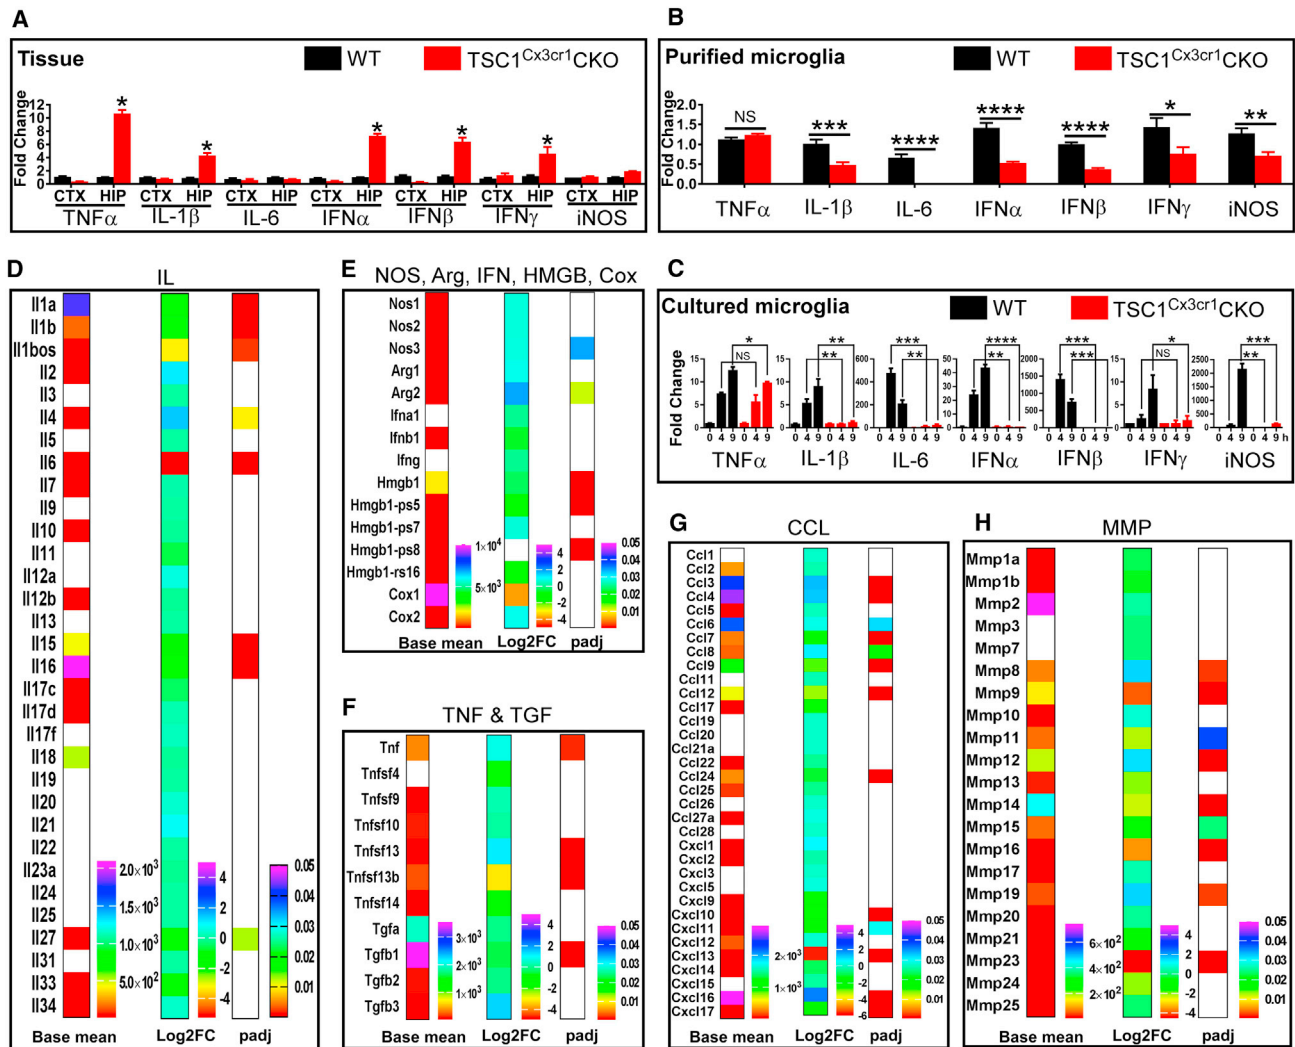

**Figure 4. Impact of Deletion of *TSC1* in Microglia on Production of Cytokines, Chemokines, and Other Inflammatory Mediators**

(A) qRT-PCR analysis of cytokine expression in cortical and hippocampal tissues of WT (n = 3; 2 males and 1 female) and *TSC1<sup>Cx3cr1</sup>CKO* (n = 3; 2 males and 1 female) mice.

(B) Cytokine expression in purified microglia from control (n = 3; 2 males and 1 female) and *TSC1<sup>Cx3cr1</sup>CKO* (n = 3; 2 males and 1 female) mice (n = 3). See also Figures S5B–S5E.

(C) Cytokine expression in cultured microglia prepared from control and *TSC1<sup>Cx3cr1</sup>CKO* mice (n = 4–5). Data are presented as mean ± SEM (t test). NS, not significant; \*p < 0.05, \*\*p < 0.01, \*\*\*p < 0.001, and \*\*\*\*p < 0.0001.

(D–H) Heatmap plot of the expression of *IL* (D), *NOS*, *Arg*, *IFN*, *HMGB*, and *Cox* (E), *TNF* and *TGF* (F), *CCL* (G), and *MMP* (H). Plot showing basal levels of gene expression in control microglia (Basemean), fold changes (log2FC) in *TSC1<sup>Cx3cr1</sup>CKO* microglia, and p values (padj) to evaluate the significance of the changes. Non-color-filled spaces indicate expression was either undetectable or padj value > 0.05. See also Figure S4.

effectively labeled and pulled down by anti-Cx3cr1 antibodies for FACS analysis of microglial population and transcriptional analysis (Figures S2B and S5B–S5E). The exact role of altered expression of these receptors in the innate immune response of *TSC1<sup>Cx3cr1</sup>CKO* microglia is unclear. Notably, Tlr9 is known to mediate the DNA-elicited innate immune response in microglia (Matsuda et al., 2015). Downregulation of Tlr9 may explain, in part, the reduced innate immune response in *TSC1<sup>Cx3cr1</sup>CKO* microglia. Together, these findings suggest that elevated mTOR signaling in microglia suppresses their pro-inflammatory response.

### Elevated mTOR Signaling in Microglia Causes Significant Neuroanatomical Changes

We next set out to examine possible any phenotypic changes other than those involving microglia in the *TSC1<sup>Cx3cr1</sup>CKO* mouse brain. We found neither apparent gross abnormalities, including brain size, nor any significant change in overall neuronal density in the cortex and hippocampus (data not shown). In a normal brain, neurons in the hippocampal pyramidal layer and the dentate granules are densely packed, with the soma displaying very minimal direct contact with microglia. However, in *TSC1<sup>Cx3cr1</sup>CKO* mice, we observed significant

microglial infiltration into hippocampal pyramidal and granule layers (Figures 5A, 5B, and S5A). The mean number of microglia in the hippocampal pyramidal and granule layers was 4–6/ $\mu\text{m}^2$  in  $TSC1^{\text{Cx3cr1}}$ CKO mice versus 2–2.5/ $\mu\text{m}^2$  in control mice.

Excitatory synapses in the cortex and hippocampus were identified by co-localization of vGlut2 and homer, which are pre- and post-synaptic markers, respectively. We observed a significant reduction in the number of co-localized homer1 and vGlut2 punctae in the cortex and hippocampus of  $TSC1^{\text{Cx3cr1}}$ CKO mice compared to wild-type mice (Figures 5C and 5E). Inhibitory synapses were also examined by labeling pre- and post-inhibitory synaptic sites with anti-vGAT and anti-gephyrin, respectively (Figures 5D and 5F). We observed a significant reduction in the density of inhibitory synapses in the hippocampal dentate gyrus and a moderate reduction in the cortex and hippocampal CA3 region in  $TSC1^{\text{Cx3cr1}}$ CKO mice compared to wild-type mice. Notably, the density of the pre-synaptic marker vGAT was moderately elevated, whereas that of the post-synaptic marker gephyrin was reduced. This may account for the observed reduction of inhibitory synapses.

Astrocytes become reactive and hyperproliferate when they encounter activated microglia (Liddelow et al., 2017). We asked whether astrocytes also exhibit any phenotypic changes. GFAP is a conventional marker for a subset of astrocytes that is strongly expressed in the hippocampus and moderately expressed in the cortex. Notably, GFAP expression is elevated in reactive astrocytes. Accordingly, we performed staining of GFAP to examine this particular subset of astrocytes. In control mouse brain, we observed GFAP-positive astrocytes predominantly in the hippocampus, with weakly stained astrocytes in the cortex. In contrast, we saw a marked increase of GFAP-positive astrocytes throughout the entire brain of  $TSC1^{\text{Cx3cr1}}$ CKO mice (Figures 5G–5I). Moreover, these astrocytes stained positive for complement 3 (C3) (Figures 5H and 5J), which was reported to be present in reactive astrocytes (Liddelow et al., 2017). qPCR revealed that transcripts reported to be preferentially present in reactive astrocytes were increased in  $TSC1^{\text{Cx3cr1}}$ CKO mice (Figures S5F–S5I). These data suggest that the astrocytes adopt a reactive-like phenotype.

Compliments has been implicated in synapse pruning (Schafer et al., 2012) and were reported to be upregulated in a status epilepticus model (Schartz et al., 2018). Accordingly, we analyzed RNA-seq data to evaluate the expression profile of compliments and their receptors in microglia. Microglia express high levels of *C1q* members and a moderate level of *C3ar1* (Figure S4F). There was a 1–1.2 log<sub>2</sub>-fold increase of *C1qa* and *C1qc* and 1.8 log<sub>2</sub>-fold increase of *C3ar1* in  $TSC1^{\text{Cx3cr1}}$ CKO microglia. *Cd200R*, *Megf10*, and *Mertk* have been reported to regulate phagocytosis (Hong et al., 2016). We observed a marked induction of *Cd220r2* and *Cd220r4* by 5–6 log<sub>2</sub>-fold in  $TSC1^{\text{Cx3cr1}}$ CKO microglia.

### Elevated mTOR Signaling in Microglia Is Sufficient to Promote the Development of SRSs

We evaluated whether homeostatic changes have a role in epileptogenesis. We found that  $TSC1^{\text{Cx3cr1}}$ CKO mice begin to display early-onset limbic and convulsive seizures, and even die, as early as a few days after weaning (~3.5–4 weeks old).

Nearly 100% of the mice developed spontaneous recurrent seizures (SRSs) by 5 weeks of age (Figure 6A).  $TSC1^{\text{Cx3cr1}}$ CKO mice also exhibited a steep drop in survival over a very narrow period (~10 days) (Figure 6A). None of the animals survived longer than 5 weeks. Moreover, we noted a clear positive correlation between the onset of seizures and mortality. Video recording confirmed that all deaths were immediately preceded by severe seizures, suggesting that seizures were the primary cause of death.

To verify that the behavioral seizures observed in  $TSC1^{\text{Cx3cr1}}$ CKO mice were accompanied by electrographic abnormalities, we performed video/epidural electroencephalogram (EEG) recording on control and  $TSC1^{\text{Cx3cr1}}$ CKO mice (McMahon et al., 2012). The behavioral seizures were accompanied by stereotypical electrographic seizures, beginning with progressive changes toward higher frequencies and amplitudes, and followed by prolonged postictal suppression of amplitude, a hallmark of electrographic seizures. None of the control animals evidenced any seizures (Figures 6B and 6C). The SRSs in  $TSC1^{\text{Cx3cr1}}$ CKO mice were quite severe, with frequencies up to 6 episodes per day and in some cases lasting up to 1.5 min (Figure 6C).

Microglia express *Cx3cr1* during brain development. Deletion of *TSC1* in microglia could impact brain development, resulting in epilepsy. We examined whether elevated mTOR signaling in microglia of the adult brain is still epileptogenic. Inducible  $TSC1^{\text{Cx3cr1-CreERT2}}$  mice were generated by crossing *Cx3CR1-CreERT2* mice (Parkhurst et al., 2013) with  $TSC1^{\text{floxed}}$  mice (Kwiatkowski et al., 2002).  $TSC1^{\text{Cx3cr1-CreERT2}}$  and control mice at 8–10 weeks of age were treated with either vehicle or tamoxifen for 5 days. Mouse brains were harvested 9 days post-tamoxifen treatment. We found a significant elevation of pS6 in microglia of  $TSC1^{\text{Cx3cr1-CreERT2}}$  mouse brains, but very few in control animals (Figures S6A and S6C). Moreover, we observed a marked increase in the number of microglia (Figures S6A and S6D), with altered morphology (Figure S6E) and strong induction of CD68 (Figures S6B and S6F) in tamoxifen-treated  $TSC1^{\text{Cx3cr1-CreERT2}}$  mice, which recapitulates what we observed in  $TSC1^{\text{Cx3cr1-Cre}}$  mice. More importantly, the tamoxifen-treated  $TSC1^{\text{Cx3cr1-CreERT2}}$  mice developed SRS as early as three days post cessation of tamoxifen treatment. Over the 26 days of continuous video/EEG recording, four of six animals developed SRS (Figures 6D–6F), with an average of 1 to 1.5 seizures per day and an average duration of 20 s (Figure 6F). Three of these mice died from seizures (Figure 6D). None of the tamoxifen-treated control animals developed seizures. Thus, activation of mTOR signaling in microglia of the adult mouse brain is sufficient to drive epileptogenesis.

## DISCUSSION

Here, we demonstrated that when mTOR signaling is elevated, microglia adopt a noninflammatory reactive phenotype, including an amoeboid-like morphology, hyperproliferation, robust phagocytosis activity, and expression of lysosome genes, but without significant induction of pro-inflammatory cytokines. Moreover, phenotypic changes of the microglia led to pronounced neuroanatomical alterations, including significant



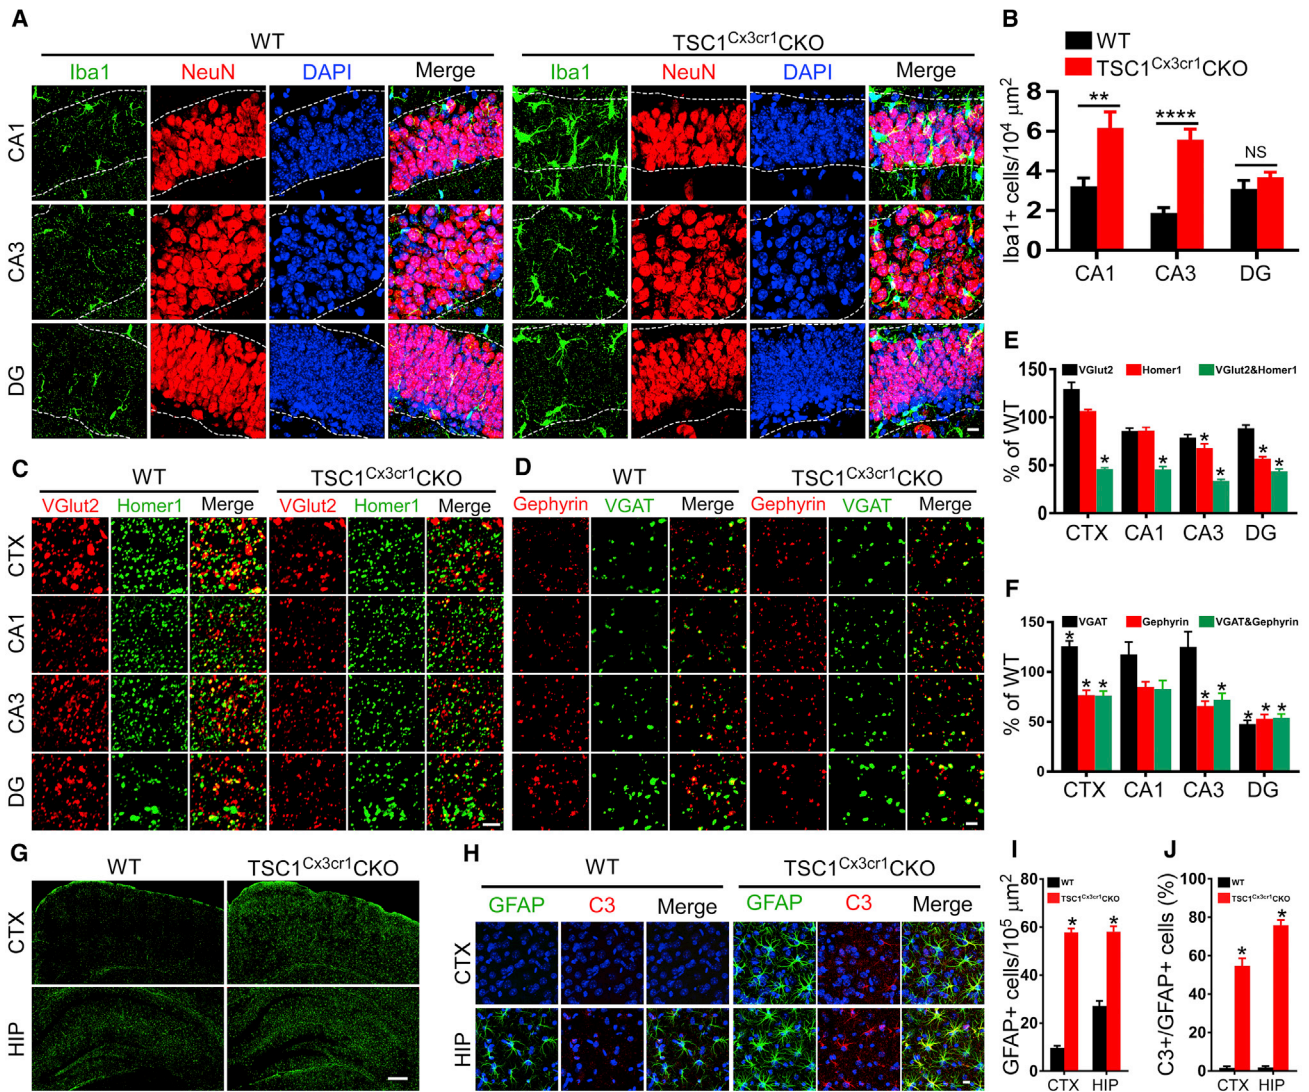

**Figure 5. Infiltration of Microglia into Hippocampal Pyramidal and Granular Layers, Reduction of Synapse Density, and Proliferation of Astrocytes in *TSC1<sup>Cx3cr1</sup>CKO* Mice**

(A) Representative high-magnification images showing infiltration by microglia CA1, CA3, and DG. See also Figure S5A. Scale bar, 10 μm.

(B) Quantification of microglia in CA1, CA3, and DG of control (n = 6; 3 males and 3 females) and *TSC1<sup>Cx3cr1</sup>CKO* (n = 7; 3 males and 4 females) mice. Data are presented as mean ± SEM t test. NS, not significant; \*p < 0.05, \*\*p < 0.01, and \*\*\*\*p < 0.0001, respectively.

(C and D) Representative super-resolution images of co-immunostaining of vGlut2 (red)/Homer1 (green) (C) and vGAT/Gephyrin (D) in the M1 motor cortex around layer IV (CTX), the hippocampal (HIP) radiatum layer adjacent to pyramidal CA1 (CA1), the stratum lucidum adjacent to CA3 (CA3), and the dentate gyrus (DG) of WT and *TSC1<sup>Cx3cr1</sup>CKO* mice. Synapses were identified as yellow dots, reflecting co-localization of the pre-synaptic markers vGlut2 and vGAT with the post-synaptic markers Homer1 and Gephyrin. Scale bar, 2 μm.

(E and F) Quantification of excitatory synapse density in *TSC1<sup>Cx3cr1</sup>CKO* mice (n = 7; 3 males and 4 females) presented as percentage of WT (n = 6; 3 males and 3 females) (E) and inhibitory synapse density in *TSC1<sup>Cx3cr1</sup>CKO* (n = 5; 3 males and 2 females) and WT (n = 5; 3 males and 2 females) mice (t test) (F). \*p < 0.05.

(G) Representative images covering the entire HIP and partial CTX showing a moderate increase of GFAP-positive astrocytes in the HIP and a robust increase in the CTX of *TSC1<sup>Cx3cr1</sup>CKO* mice. Scale bar, 200 μm.

(H) Representative high-magnification images of triple staining of Iba1, C3 and DAPI in the HIP and CTX of WT and *TSC1<sup>Cx3cr1</sup>CKO* mice. Scale bar, 10 μm.

(I) Quantification of GFAP-positive cells in the HIP and CTX of WT (n = 6; 3 males and 3 females) and *TSC1<sup>Cx3cr1</sup>CKO* (n = 7; 3 males and 4 females) mice (t test). \*\*\*\*p < 0.0001.

(J) Quantification of C3 and GFAP double-positive cells in the HIP and CTX of WT (n = 6; 3 males and 3 females) and *TSC1<sup>Cx3cr1</sup>CKO* (n = 7; 3 males and 4 females) mice (Mann-Whitney test). \*p < 0.05.

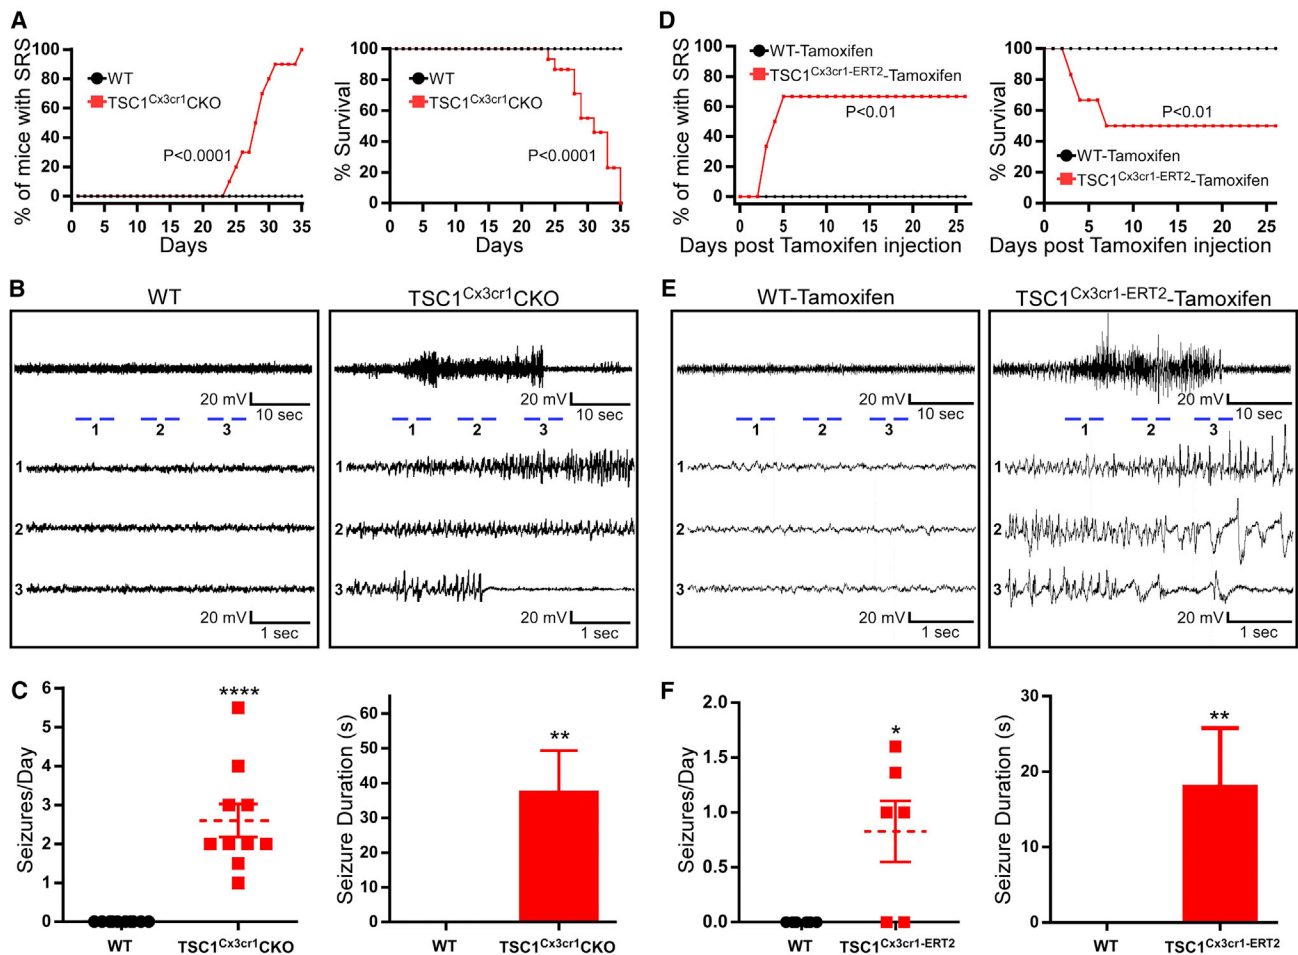

**Figure 6. Development of Spontaneous Recurrent Seizures in *TSC1<sup>Cx3cr1</sup>CKO* and *TSC1<sup>Cx3cr1-ERT2</sup>CKO* Mice**

(A) Percentage of mice displaying SRS and mortality in WT (n = 10, 5 males and 5 females) and *TSC1<sup>Cx3cr1</sup>CKO* mice (n = 10; 5 males and 5 females). Log-rank (Mantel-Cox) test. p < 0.0001.

(B) Representative electrographic traces of SRS in WT and *TSC1<sup>Cx3cr1</sup>CKO* mice.

(C) Average frequency and duration of seizures in WT (n = 10; 5 males, 5 females) and *TSC1<sup>Cx3cr1</sup>CKO* (n = 10; 5 males, 5 females) mice. Data are presented as mean ± SEM. Mann-Whitney test. \*\* and \*\*\*\*p < 0.01 and 0.001, respectively.

(D) Percentage of mice displaying SRS and mortality up to 26 days post tamoxifen treatment in WT (n = 6; 3 males, 3 females) and *TSC1<sup>Cx3cr1-ERT2</sup>* mice (n = 6; 3 males, 3 females). Log-rank (Mantel-Cox) test. p < 0.01.

(E) Representative electrographic traces of SRS recorded from tamoxifen-treated WT and *TSC1<sup>Cx3cr1-ERT2</sup>* mice.

(F) Average seizure frequency and duration of seizures in tamoxifen-treated WT (n = 6; 3 males, 3 females) and *TSC1<sup>Cx3cr1-ERT2</sup>* (n = 6; 3 males and 3 females) mice. Data are presented as mean ± SEM. \*\*p < 0.01 and \*\*\*\*p < 0.001 (Mann-Whitney test). See also Figure S6.

infiltration by microglia into hippocampal pyramidal and dentate granule layers, reduction in synapse density, moderate neurodegeneration, and hyperproliferation of astrocytes. Importantly, the mice developed severe spontaneous seizures. Together, our studies provide compelling evidence supporting a critical role of microglia in CNS homeostasis and revealing an epileptogenic mechanism that is independent of the microglial inflammatory response.

### mTOR Signaling Regulates Microglial Morphology

Morphologically, microglia are extensively ramified while in a “resting” state, which facilitates minimal but essential contact simultaneously with multiple neurons and non-neuronal cells

for surveillance in the CNS, including synaptic pruning, removal of dead cells, and recruitment of astrocytes. We found that microglia in *TSC1<sup>Cx3cr1</sup>CKO* mice displayed striking morphological changes correlating with marked neuroanatomical changes. This supports the notion that maintaining a ramified morphology of microglia could be critical for CNS homeostasis. Mechanistically, it remains to be determined how mTOR signaling regulates microglial morphology. Because mTOR signaling in general promotes cell growth and cell enlargement (Laplante and Sabatini, 2012), this could explain, in part, the increased cell size and thickness of the microglia processes in the brains of *TSC1<sup>Cx3cr1</sup>CKO* mice. Some previous studies revealed that *GPR-34* deficiency increases the size of the soma and reduces

branch length in microglia (Preissler et al., 2015). The small rho GTPase Cdc42 was reported to be involved in LysoPS-induced ramification of microglia (Tokizane et al., 2017). Deletion of *TSC2* was found to inhibit Cdc42 activity (Larson et al., 2010). It is conceivable that *TSC1* deletion alters microglial morphology via Cdc42.

### Elevated mTOR Signaling Promotes the Proliferation of Microglia

Maintaining an appropriate number of microglia is also vital for CNS homeostasis since changing the number alters the interactions of microglia with neurons and astrocytes. We observed that the number of microglia was significantly increased in *TSC1<sup>Cx3cr1</sup>*CKO mice at ~4 weeks of age. Although we can't entirely rule out the possibility that *TSC1* deletion may prolong the lifespan of microglia, the observed 2- to 3-fold increase in the number of microglia at 4 weeks is likely due to hyperproliferation because microglia have a long half-life (Askew et al., 2017). It is unclear how elevated mTOR signaling leads to microglial hyperproliferation in an otherwise unperturbed state. One possibility is that microglia become intrinsically hyperproliferative when mTOR signaling is elevated. Alternatively, their hyperproliferation could be extrinsically driven, reflecting a secondary response to some pathological event(s) elicited by the elevated microglial mTOR signaling (e.g., release of inflammation mediators, proliferation of astrocytes, or degeneration of neurons). We found that *TSC1<sup>Cx3cr1</sup>*CKO microglia cultured *in vitro* were hyperproliferative compared to wild-type microglia (data not shown), supporting an intrinsic role of mTOR signaling in microglial proliferation.

### mTOR Signaling Regulates Microglia Phagocytosis

Microglia are the main phagocytes in the CNS. Phagocytosis and degradation of synapses and cells are important for CNS homeostasis. Microglial phagocytosis activity is regulated in response to external triggers, including by glial cell line-derived neurotrophic factor (GDNF), Toll-like receptor (TLR) ligands, uridine diphosphate (UDP), and CD200 receptors, the expression of phagocytosis receptors such as *MEGF10* and *MERTK*, and complement cascades (Hong et al., 2016). We observed moderate induction of *C1q* members and *C3ar1*, and a marked induction of *Cd200r2* and *Cd200r4* in *TSC1<sup>Cx3cr1</sup>*CKO microglia. This is consistent with the robust phagocytosis activity observed in *TSC1<sup>Cx3cr1</sup>*CKO microglia. In addition, we found that several other genes in the phagocytosis pathway were upregulated, including *Colec12* (collectin subfamily member 12; also called scavenger receptor class A, member 4), *Igkc* (immunoglobulin kappa constant), *Iglc2* (immunoglobulin lambda constant 2), *C2* (complement c2), *Pparg* (peroxisome proliferator-activated receptor gamma, also called PPAR- $\gamma$ ), and *Gsn* (gelsolin). Their biological significance in phagocytosis needs to be determined. Notably, a recent study characterized the microglial phagocytic response in mouse brain following acute or chronic inflammatory challenges and kainic acid (KA) treatment, as well as in human epileptic brains (Abiega et al., 2016). The authors found that acute seizures elicited by KA trigger widespread release of ATP, which in turn impairs microglial phagocytosis. This also occurred in TLE and KA mouse model. This elegant

study revealed a mechanism by which an external stimulus regulates microglia-mediated cleanup of apoptotic cells. In contrast, our study focused on microglial mTOR signaling, which is elevated in the epileptic brain. Of note, epileptogenic neurological insults likely trigger many events simultaneously. To better isolate the biological significance of the elevated mTOR signaling in microglia, we utilized a genetic approach to modify the mTOR activity in microglia. The elevated mTOR signaling serves as a primary attack on microglia. Our data demonstrated that elevated mTOR signaling in microglia enhances their capacity for phagocytosis. In our *in vitro* phagocytosis assay, the particles become visible in mature phagosomes and phagolysosomes, where the pH is low. A previous study revealed that phagosomes in M2 macrophages (less inflammatory form) tend to be acidified rapidly within 10 min, versus those in M1 macrophages (proinflammatory form), which are less amenable to acidification, take approximately 30 min (Canton et al., 2014). We observed that phagosome acidification was accelerated in the microglia prepared from *TSC1<sup>Cx3cr1</sup>*CKO mice, suggesting that *TSC1<sup>Cx3cr1</sup>*CKO microglia tend to adopt a less inflammatory phenotype (Canton et al., 2014). The accelerated accumulation of particles in phagolysosomes that we observed in *TSC1<sup>Cx3cr1</sup>*CKO mice appears to reflect increased phagocytosis rather than a delay in the degradation/clearance of particles. However, this needs to be clarified in future studies. We noticed that the cell sizes of microglia prepared from *TSC1<sup>Cx3cr1</sup>*CKO mice were significantly larger than wild-type. Thus, the increased number of phagocytic particles per cell may also reflect the increased capacity of phagocytosis.

### Elevated mTOR Signaling Promotes a Reactive-like Morphology of Microglia without Significant Induction of Proinflammatory Cytokines

As innate immune cells in the brain, microglia are potent cytokine/chemokine producers. Microglia-mediated neuroinflammation has been postulated to be one of the plausible causes of epileptogenesis (Aronica et al., 2017). However, many other types of cells, including infiltrated monocytes, also produce pro-inflammatory cytokines/chemokines. It is therefore challenging to pinpoint the exact cellular sources of pro-inflammatory cytokines/chemokines *in vivo* and thus the exact contribution of microglia. In the *TSC1<sup>Cx3cr1</sup>*CKO mouse model, microglia are highly proliferated throughout the entire brain. Purified microglia from *TSC1<sup>Cx3cr1</sup>*CKO mice do not display any significant elevation in the expression of pro-inflammatory cytokines. Furthermore, deletion of *TSC1* impairs the innate immune response in cultured microglia. Mechanistically, *Tlr 9* is downregulated in *TSC1<sup>Cx3cr1</sup>*CKO microglia. This may represent an underlying mechanism of impaired innate immune response. *TSC1* deletion promotes macrophages to adopt an inflammatory M1 phenotype (Zhu et al., 2014). However, we found that microglial deletion of *TSC1* attenuates the pro-inflammatory response. This is a significant departure from what was previously reported in macrophages, which may reflect differences in the signaling cascades involved in microglia and macrophages or the differences in the stimulation (lipopolysaccharide [LPS] versus DNA) employed. Of note, although M1/M2 polarization has been extensively described in macrophages, microglia do not

undergo distinct M1/M2 polarization (Ransohoff, 2016). Nevertheless, we found that the elevated mTOR signaling promotes a reactive-like morphology in microglia, without significant induction of proinflammatory cytokines.

### Induction of Lysosome Genes in $TSC1^{Cx3cr1}$ CKO Microglia

Quiescent microglia express a nearly undetectable level of lysosomal protein CD68 in an unperturbed brain. The induction of CD68 appears to be persistent for many months after initial neurological insults (van Vliet et al., 2012). We observed strong induction of CD68 in the microglia of  $TSC1^{Cx3cr1}$ CKO mice. Thus, the discordance between the induction of CD68, but not of inflammatory cytokines, indicates that microglia with induced CD68 are not necessarily inflammatory. CD68-positive microglia are frequently observed in brains exhibiting chronic spontaneous seizures (Boer et al., 2006; van Vliet et al., 2012). These cells are generally postulated to be pro-inflammatory and the source of epileptogenic pro-inflammatory cytokines and mediators. Future study will determine whether the CD68-positive microglia observed in epileptic brains are true “activated” or “pro-inflammatory” microglia with robust production of inflammatory cytokines. Apart from CD68, many lysosome genes were upregulated, reflecting lysosomal biogenesis. Increased lysosomal biogenesis has been reported in activated microglia (Tanaka et al., 2013). Moreover, the mTOR/autophagy pathway is closely linked to lysosomal biogenesis (Settembre et al., 2011). Given that  $TSC1$  deficit alters mTOR as well as autophagy activity (Laplante and Sabatini, 2012), the induction of lysosomal genes such as CD68 could be a direct consequence of altered mTOR signaling. Notably, a recent study revealed that the Rag-Ragulator complex regulates microglial development and lysosomal activity in zebrafish (Shen et al., 2016). Inactivation of this complex reduces the number of microglia, along with accumulation of lysosomal organelles. This appears to be independent of mTOR activity despite that the Rag-Ragulator complex constitutes an important part of the mTOR pathway. Here, we found that lysosome genes were markedly upregulated in  $TSC1^{Cx3cr1}$ CKO microglia, further extending the above findings.

### mTOR Signaling in Microglia Regulates the Proliferation of Astrocytes

Apart from microglia, astrocytes too are resident glial cells that play various roles in the brain, including uptake of neurotransmitters, maintenance of ion homeostasis, and modulation of neuronal functions. Microglia and astrocytes mutually shape each other's behavior, both in the unperturbed healthy brain and under pathological conditions. Pro-inflammatory cytokines and mediators such as  $TNF-\alpha$ ,  $IL-1\beta$ , and nitric oxide (NO) have been implicated in the phenotypic change of astrocytes (Liddel et al., 2017). We saw only a moderate induction of  $TNF\alpha$ ,  $IL-1\beta$  and NO in the hippocampus and no significant induction in the cortex, where GFAP-positive astrocytes were highly proliferated. We saw little induction of cytokines in purified microglia prepared from  $TSC1^{Cx3cr1}$ CKO mice. Our data strongly suggest that noninflammatory phenotypic changes of microglia in the  $TSC1^{Cx3cr1}$ CKO mouse brain may promote proliferation of astrocytes.

### Infiltration of Microglia into the Pyramidal and Granular Layers of the Hippocampus and Neuronal Degeneration

Despite seeing increased caspase-3-positive neurons and engulfed cups in the  $TSC1^{Cx3cr1}$ CKO mouse brain, we did not see a significant reduction in the number of neurons in the cortex and the hippocampus, suggesting that the neuronal degeneration is moderate. Reactive microglia appear to possess neuroprotective as well as neurotoxic functions, depending on the nature of the pathological conditions (Colonna and Butovsky, 2017). Thus, reactive-like microglia observed in the  $TSC1^{Cx3cr1}$ CKO mouse brain may not be the direct cause of neuronal degeneration. A recent study reported that the A1-type of astrocytes possesses neuron-killing properties (Liddel et al., 2017). Future studies will determine whether astrocytes adopt a neuron-killing phenotype in  $TSC1^{Cx3cr1}$ CKO mouse brain. Typically, neurons are densely packed within the hippocampal pyramidal and granular layers, forming a tightly assembled band of somata. Microglia usually reside away from the pyramidal and granular layers. We observed a marked increase of microglial infiltration into both the pyramidal and granular layers. However, it remains to be determined whether the intrinsic hyperproliferation of microglia accounts for the increased number of microglia in the cell-compacted pyramidal and granular layers. Alternatively, neuronal death could trigger infiltration by microglia into these hippocampal layers.

### mTOR Signaling in Microglia in the Regulation of Synaptic Density

Excitatory and, to some extent, inhibitory synapses are reduced in the  $TSC1^{Cx3cr1}$ CKO mouse brain. There are several mechanisms that could account for the reduction of synapse density. First, microglia are known to be involved in synapse pruning (Nimmerjahn et al., 2005). Therefore, the increased number of microglia and their phagocytosis activity could account for the reduction in synapse density. In addition, astrocytes also possess potent synapse engulfment properties when they are exposed to certain secreted factors. Astrocytes in the  $TSC1^{Cx3cr1}$ CKO brain were hyperproliferative, which may contribute to the reduced synapse density. Microglia prune both excitatory and inhibitory synapses. Synapse pruning has been reported to be dependent on the level of neuronal activity (Schafer et al., 2012). In the present study, we found that there was a significant reduction of excitatory synapse density in the cortex and hippocampus of  $TSC1^{Cx3cr1}$ CKO mice. There was also a relatively moderate reduction of inhibitory synapses in the cortex and hippocampal CA3 and no significant reduction in hippocampal CA1. The reduced level of the post-synaptic marker gephyrin appears to account for the reduction of inhibitory synapses.

### Mechanisms of Epileptogenesis in $TSC1^{Cx3cr1}$ CKO Mice

Although microglia have long been suspected to be involved in epileptogenesis, this is largely based on the assumption that neuronal injury leads to microglial activation and brain inflammation, which in turn causes epilepsy. In other animal models of epileptogenesis, initial neurological insults such as status epilepticus (SE) induced by KA or pilocarpine cause massive neuronal damage. This damage is primarily due to excitotoxicity.

However, a direct role of microglia in neurodegeneration and development of SRSs has not been convincingly demonstrated, since microglia activation represents only one part of many possible pathological changes in these models. In the present study, by largely bypassing all other pathological changes elicited by SE, we clearly demonstrated that elevated mTOR signaling in microglia is not only moderately neurodegenerative but also epileptogenic. Nearly all *TSC1*<sup>Cx3cr1</sup>CKO mice in our study developed spontaneous seizures by 5 weeks of age. The profound epileptogenic effect of microglial deletion of *TSC1* can be independent of brain development, because elevating mTOR signaling in microglia of the adult brain is sufficient to drive reactive-like morphological alterations and trigger spontaneous seizures. Thus, elevated mTOR signaling in microglia could be an epileptogenic mechanism applicable to all stages of life, from the immature to the adult brain.

Our study, however, paints a more complicated picture in terms of how microglial deletion of *TSC1* becomes so epileptogenic. First, although pro-inflammatory cytokines are known to be seizure-promoting, in *TSC1*<sup>Cx3cr1</sup>CKO mice, we observed only moderate increases in the levels of pro-inflammatory cytokines. These were predominately in the hippocampus and apparently did not originate directly from microglia. Our data do not support a pro-inflammatory role of microglia in epileptogenesis in *TSC1*<sup>Cx3cr1</sup>CKO mice. Rather, noninflammatory phenotypic changes in microglia following elevated mTOR signaling are the primary driver that disturbs brain homeostasis and lead to the development of spontaneous seizures. Second, we found that astrocytes hyper-proliferate in *TSC1*<sup>Cx3cr1</sup>CKO mice. Given that astrocytes can uptake/release glutamine to modulate neuronal excitability, it is plausible that hyperproliferation of reactive astrocytes, secondary to altered microglia, could contribute to epileptogenesis (Zhang et al., 2016). Moreover, neuronal death occurs in the pyramidal and granular layers of the hippocampus. Microglia and astrocytes infiltrate into these layers to form microinflammatory patches. It is reasonable to postulate that the infiltration by microglia/astrocytes and degeneration of neurons may create comparable pathologic changes echoing those seen in epileptic brains, which could in turn alter neuronal excitability. Finally, we cannot rule out the possibility that reduced synapse density may also play a role in epileptogenesis.

*TSC1* deletion either in astrocytes or in neurons, or broadly in early embryonic progenitor cells, leads to severe SRSs with significant mortality (McMahon et al., 2012; Zhang et al., 2016). In the present study, we found that *TSC1* deletion in microglia is also epileptogenic. The seizure severity and mortality we observed are at least comparable to, if not greater than, those seen in astrocytic and neuronal *TSC1* mouse models (McMahon et al., 2012; Zhang et al., 2016). Thus, our study extends our understanding of the mTOR signaling in epileptogenesis into a completely uncharted territory. Notably, some focal epilepsies have been linked to somatic mutations associated with hyperactivation of the mTOR signaling pathway (Jansen et al., 2015). Future studies will be needed to determine if there is somatic mutation of microglial *TSC1* in those disorders.

In summary, we found that elevated mTOR signaling can drive microglia to adopt a noninflammatory reactive-like

phenotype. This altered phenotype is associated with the loss of CNS homeostasis; i.e., reduced synapse density, proliferation of astrocytes, moderate neuronal degeneration, and development of SRSs. A microglial cell-mediated inflammatory response has long been the focus of a plausible epileptogenic mechanism. We have identified an epileptogenic role for microglia that is independent of an inflammatory response. Thus, our findings not only establish a clear role for microglia in epileptogenesis, they also point to a noninflammatory epileptogenic mechanism. In light of the observation of elevated mTOR signaling in microglia in epileptic brains, our study further cements the notion that microglia are a potential therapeutic target for epilepsy prevention.

## EXPERIMENTAL PROCEDURES

### Animals

*Rosa*<sup>mTomato/mEGFP</sup> (or *Rosa*<sup>mT/mG</sup>), *TSC1*<sup>flox/flox</sup> and Cx3cr1-ERT2 mice were acquired from Jackson Laboratory (Bar Harbor, ME), and Cx3cr1-Cre mice were from the Mutant Mouse Resource and Research Center (MMRRC). All mice were either on a C57/BL6 background or were backcrossed with C57/BL wild-type mice for more than 10 generations (see also Supplemental Experimental Procedures). Both genders were used (see figure legends for more information).

### Antibodies, Immunohistochemistry, and Acquisition of Images

All antibodies used for immunohistochemistry, FACS analysis, and cell purification are listed in Table S1, along with vendors, catalog numbers, and dilution factors. Mouse brains were fixed in 4% paraformaldehyde (PFA) in PBS, followed by cryoprotection in 30% sucrose in PBS prior to cryo-sectioning and histological analyses. Brain sections were permeabilized by 0.3% Triton X-100 in 10% BSA. Sections were incubated with primary antibodies overnight, followed by secondary antibodies. This is the general procedure unless otherwise specifically described. All images were acquired using a Zeiss LSM 880 confocal microscope with Airyscan and processed with Zen black 2.1 or Zen blue lite 2.3 (Carl Zeiss). Detailed methodologies for image acquisition and quantification of cell numbers, synapses, and phagocytosis are described in Supplemental Experimental Procedures.

### Microglia Culture, Treatment with Interferon Stimulatory DNA, and In Vitro Phagocytosis Assay

Primary microglia cultures were prepared from postnatal day 1 (P1) or P2 mice. Microglia were either treated with ISD for 4 or 9 hr prior to harvesting total RNA and qPCR analysis or used for microglial uptake assay with pHrodo Green zymosan bioparticles. Images were acquired at 1 frame/min for 61 cycles with the green fluorescence channel and DIC using a 63× oil objective using a Zeiss LSM 880 confocal microscope (Supplemental Experimental Procedures).

### Purification of Microglia and Astrocytes, FACS Analysis, and In Vivo Phagocytosis Assay

Mouse brain tissues were digested, followed by neutralization and pipetting, and then passed through a 30- $\mu$ m cell strainer. Myelin was removed by 70% Percoll centrifugation. Derived single-cell suspensions were either analyzed using LSR II Flow Cytometer (BD Biosciences) or purification of microglia and astrocytes with magnetic beads. For FACS analysis of microglia, cells were first blocked with anti-mouse CD16/CD32 (BioLegend) prior to staining with antibodies against surface or intracellular markers. To purify microglia and astrocytes, cell suspensions were also blocked with anti-mouse CD16/CD32, followed by anti-Cx3cr1-PE (BioLegend) and anti-ACSA-2-PE antibodies (Miltenyi), respectively, along with anti-PE MicroBeads (Miltenyi) to capture bound cells. For the in vivo phagocytosis assay, 0.5  $\mu$ L of FITC-labeled zymosan particle suspension was infused into the hippocampus

via cannula. Microglia were purified by the Percoll centrifugation, stained, and analyzed by FACS analysis (Supplemental Experimental Procedures).

### Real-Time PCR and RNA-Seq

Total RNA was extracted using TRIzol Reagent (Life Technologies). RT-PCR was performed in a Step One Plus Real-time PCR System (Applied Biosystems). Four sets of total RNA samples were prepared from control and *TSC1<sup>Cx3cr1</sup>*CKO mouse brains and submitted to the Genomics Research Center at University of Rochester for RNA-seq. The primary data analysis for differential expression was completed using DeSeq2-1.10.1 by the genomics center. The heatmap diagrams were produced either using iPathway Guide (Advaita) or GraphPad Prism5 (La Jolla, CA).

### Video/EEG Monitoring of Spontaneous Seizures

Video/EEG recording was done according to previously published work (McMahon et al., 2012). 22- to 25-day-old control and *TSC1<sup>Cx3cr1</sup>*CKO mice were implanted epidurally with three-channel EEG electrodes (Plastics One). Mice were monitored using a video/EEG system 24 hr per day for up to 5 weeks. All electrographic seizures were verified behaviorally by video data to exclude movement artifacts. Six pairs of *Cx3cr1-CreERT2<sup>+/-</sup>* and *Cx3cr1-CreERT2<sup>+/-</sup>-TSC1<sup>fl/fl</sup>* mice at 8 to 10 weeks of age were implanted with electrodes 2 or 3 days prior to tamoxifen treatment. Video/EEG recording began immediately after cession of 5-day tamoxifen treatment and continued for up to 26 days.

### Statistical Analysis

Data were analyzed using GraphPad Prism 7 software with appropriate tests for comparisons between wild-type and *TSC1<sup>Cx3cr1</sup>*CKO mice. Student's *t* test was used to test the differences between two groups. A two-way ANOVA followed by Tukey's multiple comparisons was used to examine the differences among multiple groups. A log-rank (Mantel-Cox) test was used to analyze the rates of spontaneous seizures and mortality. The Mann-Whitney test was employed to test the difference in seizure frequency and duration. A *p* value of < 0.05 was considered significant. Data are shown as the mean ± SEM.

Further details and an outline of resources used in this work can be found in Supplemental Experimental Procedures.

### DATA AND SOFTWARE AVAILABILITY

The accession number for the RNA-seq data reported in this paper is GEO: GSE108625.

### SUPPLEMENTAL INFORMATION

Supplemental Information includes Supplemental Experimental Procedures, six figures, and two tables and can be found with this article online at <https://doi.org/10.1016/j.celrep.2018.02.004>.

### ACKNOWLEDGMENTS

The authors thank Dr. Danielle Califano for assistance with FACS analysis and Julia Nalwalk for proofreading the manuscript. This work was supported by the NIH (grant NS093045 to Y.H. and grants DK088950 and DK099566 to X. Zhao), the Ayco Foundation (Y.H.), and the Crohn's & Colitis Foundation of America (research fellowship 481637 to R.M.).

### AUTHOR CONTRIBUTIONS

X. Zhao and Y.H. conceived and designed the study. X. Zhao performed immunohistochemistry (IHC), FACS, qPCR, video/EEG recording, image acquisition, live imaging, western blot, primary culture, and data quantification. Y.L. provided assistance on genotyping, qPCR, and quantification of IHC data. S.M. and R.M. provided assistance on animal handling, IHC, and qPCR. J.M. provided assistance on imaging. X. Zhao and Y.H. analyzed data and prepared the manuscript. P.F. provided assistance on statistical analysis. M.A.A., J.Q., A.L.R., M.G., J.C., G.W.M., and X. Zhu provided helpful advice and edited the manuscript.

### DECLARATION OF INTERESTS

The authors declare no competing financial interests.

Received: September 18, 2017

Revised: December 27, 2017

Accepted: January 31, 2018

Published: February 20, 2018

### REFERENCES

- Abiega, O., Beccari, S., Diaz-Aparicio, I., Nadjar, A., Layé, S., Leyrolle, Q., Gómez-Nicola, D., Domercq, M., Pérez-Samartín, A., Sánchez-Zafra, V., et al. (2016). Neuronal hyperactivity disturbs ATP microgradients, impairs microglial motility, and reduces phagocytic receptor expression triggering apoptosis/microglial phagocytosis uncoupling. *PLoS Biol.* *14*, e1002466.
- Abraham, J., Fox, P.D., Condello, C., Bartolini, A., and Koh, S. (2012). Minocycline attenuates microglia activation and blocks the long-term epileptogenic effects of early-life seizures. *Neurobiol. Dis.* *46*, 425–430.
- Aronica, E., Bauer, S., Bozzi, Y., Caleo, M., Dingledine, R., Gorter, J.A., Henshall, D.C., Kaufner, D., Koh, S., Löscher, W., et al. (2017). Neuroinflammatory targets and treatments for epilepsy validated in experimental models. *Epilepsia* *58* (Suppl 3), 27–38.
- Askew, K., Li, K., Olmos-Alonso, A., Garcia-Moreno, F., Liang, Y., Richardson, P., Tipton, T., Chapman, M.A., Riecken, K., Beccari, S., et al. (2017). Coupled proliferation and apoptosis maintain the rapid turnover of microglia in the adult brain. *Cell Rep.* *18*, 391–405.
- Boer, K., Spliet, W.G., van Rijen, P.C., Redeker, S., Troost, D., and Aronica, E. (2006). Evidence of activated microglia in focal cortical dysplasia. *J. Neuroimmunol.* *173*, 188–195.
- Canton, J., Khezri, R., Glogauer, M., and Grinstein, S. (2014). Contrasting phagosome pH regulation and maturation in human M1 and M2 macrophages. *Mol. Biol. Cell* *25*, 3330–3341.
- Colonna, M., and Butovsky, O. (2017). Microglia function in the central nervous system during health and neurodegeneration. *Annu. Rev. Immunol.* *35*, 441–468.
- Crino, P.B. (2016). The mTOR signalling cascade: paving new roads to cure neurological disease. *Nat. Rev. Neurol.* *12*, 379–392.
- Hong, S., Dissing-Olesen, L., and Stevens, B. (2016). New insights on the role of microglia in synaptic pruning in health and disease. *Curr. Opin. Neurobiol.* *36*, 128–134.
- Jansen, L.A., Mirzaa, G.M., Ishak, G.E., O'Roak, B.J., Hiatt, J.B., Roden, W.H., Gunter, S.A., Christian, S.L., Collins, S., Adams, C., et al. (2015). PI3K/AKT pathway mutations cause a spectrum of brain malformations from megalencephaly to focal cortical dysplasia. *Brain* *138*, 1613–1628.
- Kwiatkowski, D.J., Zhang, H., Bandura, J.L., Heiberger, K.M., Glogauer, M., el-Hashemite, N., and Onda, H. (2002). A mouse model of TSC1 reveals sex-dependent lethality from liver hemangiomas, and up-regulation of p70S6 kinase activity in Tsc1 null cells. *Hum. Mol. Genet.* *11*, 525–534.
- Laplanche, M., and Sabatini, D.M. (2012). mTOR signaling in growth control and disease. *Cell* *149*, 274–293.
- Larson, Y., Liu, J., Stevens, P.D., Li, X., Li, J., Evers, B.M., and Gao, T. (2010). Tuberous sclerosis complex 2 (TSC2) regulates cell migration and polarity through activation of CDC42 and RAC1. *J. Biol. Chem.* *285*, 24987–24998.
- Liddelow, S.A., Guttenplan, K.A., Clarke, L.E., Bennett, F.C., Bohlen, C.J., Schirmer, L., Bennett, M.L., Münch, A.E., Chung, W.S., Peterson, T.C., et al. (2017). Neurotoxic reactive astrocytes are induced by activated microglia. *Nature* *541*, 481–487.
- Liu, J., Reeves, C., Michalak, Z., Coppola, A., Diehl, B., Sisodiya, S.M., and Thom, M. (2014). Evidence for mTOR pathway activation in a spectrum of epilepsy-associated pathologies. *Acta Neuropathol. Commun.* *2*, 71.
- Matsuda, T., Murao, N., Katano, Y., Juliandi, B., Kohyama, J., Akira, S., Kawai, T., and Nakashima, K. (2015). TLR9 signalling in microglia attenuates

- seizure-induced aberrant neurogenesis in the adult hippocampus. *Nat. Commun.* 6, 6514.
- McMahon, J., Huang, X., Yang, J., Komatsu, M., Yue, Z., Qian, J., Zhu, X., and Huang, Y. (2012). Impaired autophagy in neurons after disinhibition of mammalian target of rapamycin and its contribution to epileptogenesis. *J. Neurosci.* 32, 15704–15714.
- Nimmerjahn, A., Kirchhoff, F., and Helmchen, F. (2005). Resting microglial cells are highly dynamic surveillants of brain parenchyma in vivo. *Science* 308, 1314–1318.
- Parkhurst, C.N., Yang, G., Ninan, I., Savas, J.N., Yates, J.R., 3rd, Lafaille, J.J., Hempstead, B.L., Littman, D.R., and Gan, W.B. (2013). Microglia promote learning-dependent synapse formation through brain-derived neurotrophic factor. *Cell* 155, 1596–1609.
- Pitkänen, A., and Lukasiuk, K. (2011). Mechanisms of epileptogenesis and potential treatment targets. *Lancet Neurol.* 10, 173–186.
- Preissler, J., Grosche, A., Lede, V., Le Duc, D., Krügel, K., Matyash, V., Szulzewsky, F., Kallendrusch, S., Immig, K., Kettenmann, H., et al. (2015). Altered microglial phagocytosis in GPR34-deficient mice. *Glia* 63, 206–215.
- Ransohoff, R.M. (2016). A polarizing question: do M1 and M2 microglia exist? *Nat. Neurosci.* 19, 987–991.
- Rosito, M., Lauro, C., Chece, G., Porzia, A., Monaco, L., Mainiero, F., Catalano, M., Limatola, C., and Trettel, F. (2014). Transmembrane chemokines CX3CL1 and CXCL16 drive interplay between neurons, microglia and astrocytes to counteract pMCAO and excitotoxic neuronal death. *Front. Cell. Neurosci.* 8, 193.
- Schafer, D.P., Lehrman, E.K., Kautzman, A.G., Koyama, R., Mardinly, A.R., Yamasaki, R., Ransohoff, R.M., Greenberg, M.E., Barres, B.A., and Stevens, B. (2012). Microglia sculpt postnatal neural circuits in an activity and complement-dependent manner. *Neuron* 74, 691–705.
- Schartz, N.D., Wyatt-Johnson, S.K., Price, L.R., Colin, S.A., and Brewster, A.L. (2018). Status epilepticus triggers long-lasting activation of complement C1q-C3 signaling in the hippocampus that correlates with seizure frequency in experimental epilepsy. *Neurobiol. Dis.* 109 (Pt A), 163–173.
- Settembre, C., Di Malta, C., Polito, V.A., Garcia Arencibia, M., Vetrini, F., Erdin, S., Erdin, S.U., Huynh, T., Medina, D., Colella, P., et al. (2011). TFEB links autophagy to lysosomal biogenesis. *Science* 332, 1429–1433.
- Shen, K., Sidik, H., and Talbot, W.S. (2016). The Rag-Ragulator complex regulates lysosome function and phagocytic flux in microglia. *Cell Rep.* 14, 547–559.
- Sierra, A., Encinas, J.M., Deudero, J.J., Chancey, J.H., Enikolopov, G., Overstreet-Wadiche, L.S., Tsirka, S.E., and Maletic-Savatic, M. (2010). Microglia shape adult hippocampal neurogenesis through apoptosis-coupled phagocytosis. *Cell Stem Cell* 7, 483–495.
- Sosunov, A.A., Wu, X., McGovern, R.A., Coughlin, D.G., Mikell, C.B., Goodman, R.R., and McKhann, G.M., 2nd. (2012). The mTOR pathway is activated in glial cells in mesial temporal sclerosis. *Epilepsia* 53 (Suppl 1), 78–86.
- Tanaka, Y., Matsuwaki, T., Yamanouchi, K., and Nishihara, M. (2013). Increased lysosomal biogenesis in activated microglia and exacerbated neuronal damage after traumatic brain injury in progranulin-deficient mice. *Neuroscience* 250, 8–19.
- Tokizane, K., Konishi, H., Makide, K., Kawana, H., Nakamuta, S., Kaibuchi, K., Ohwada, T., Aoki, J., and Kiyama, H. (2017). Phospholipid localization implies microglial morphology and function via Cdc42 in vitro. *Glia* 65, 740–755.
- van Vliet, E.A., Forte, G., Holtman, L., den Burger, J.C., Sinjewel, A., de Vries, H.E., Aronica, E., and Gorter, J.A. (2012). Inhibition of mammalian target of rapamycin reduces epileptogenesis and blood-brain barrier leakage but not microglia activation. *Epilepsia* 53, 1254–1263.
- Zhang, B., Zou, J., Han, L., Rensing, N., and Wong, M. (2016). Microglial activation during epileptogenesis in a mouse model of tuberous sclerosis complex. *Epilepsia* 57, 1317–1325.
- Zhu, L., Yang, T., Li, L., Sun, L., Hou, Y., Hu, X., Zhang, L., Tian, H., Zhao, Q., Peng, J., et al. (2014). TSC1 controls macrophage polarization to prevent inflammatory disease. *Nat. Commun.* 5, 4696.

**Cell Reports, Volume 22**

**Supplemental Information**

**Noninflammatory Changes of Microglia**

**Are Sufficient to Cause Epilepsy**

**Xiaofeng Zhao, Yuan Liao, Shannon Morgan, Ramkumar Mathur, Paul Feustel, Joseph Mazurkiewicz, Jiang Qian, Julia Chang, Gary W. Mathern, Matthew A. Adamo, Anthony L. Ritaccio, Michael Gruenthal, Xinjun Zhu, and Yunfei Huang**



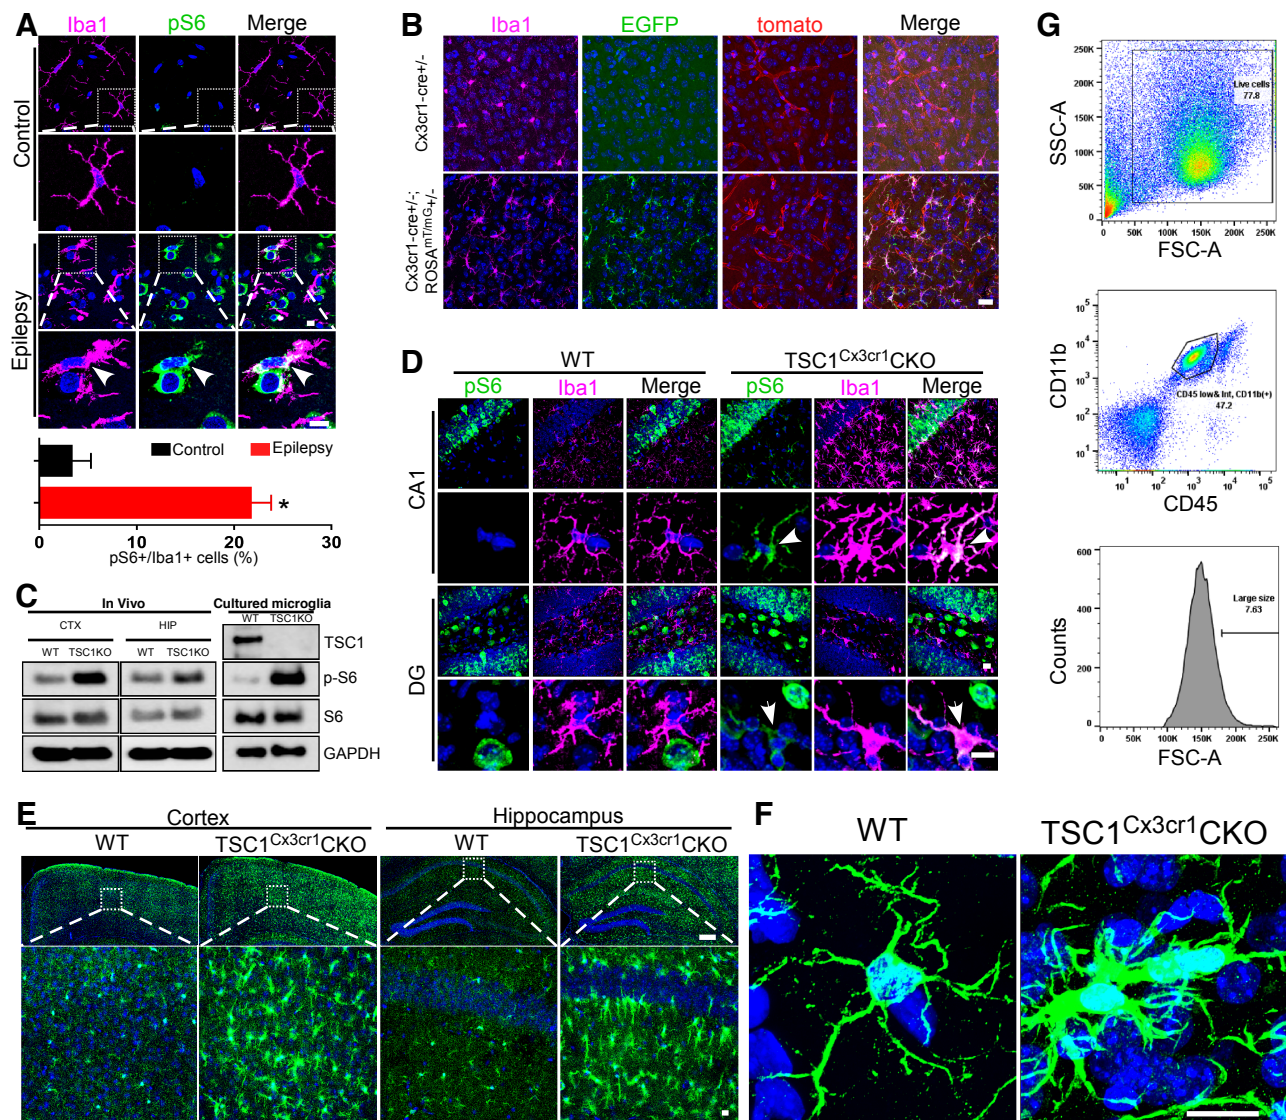

**Figure S1. Elevated microglial mTOR signaling in epileptic brain samples, characterization of *TSC1* deletion in *TSC1<sup>Cx3cr1</sup>CKO* mice, and evaluation of microglial morphology, Related to Figure 1.**

Human brain cortical sections were stained with anti-Iba1 (Pink), anti-pS6 (green), and DAPI (blue). **A**) Representative images of Iba1 and pS6 staining in human brain sections from epilepsy surgery and controls. The arrow points to a microglial cell that was positively stained with pS6. Quantification of pS6-positive microglia in cortical specimens from control and epilepsy surgeries (n=3; 3 control, 3 epilepsy). t-test, \*p<0.05. Scale bar: 10  $\mu$ m. **B**) Verification of *Cx3cr1-cre*-mediated deletion of the floxed sequence in microglia. Cre-dependent expression of eGFP in cortical sections prepared from *Cx3cr1-cre<sup>+/+</sup>;Rosa<sup>MT/mG<sup>+/+</sup></sup>* mice. EGFP (green) is co-localized with Iba1 (magenta), confirming that the *Cx3cr1* promoter drives cre-dependent expression specifically in microglia. Scale bar: 20  $\mu$ m. **C**) Protein lysates were prepared from cortex (CTX) and hippocampus (HIP) and cultured microglia of wild-type (WT) and *TSC1<sup>Cx3cr1</sup>CKO* mice. Western blot analysis of TSC1, total and phosphorylated S6. **D**) Immunohistological analysis of Iba1 (magenta) and pS6 (green) in hippocampal CA1 and the dentate gyrus (DG) from WT and *TSC1<sup>Cx3cr1</sup>CKO* mice. Arrowheads mark the co-localization of Iba1 and p-S6. Scale bar: 10  $\mu$ m. **E**) Representative images covering the entire cortical and hippocampal fields were acquired from WT and *TSC1<sup>Cx3cr1</sup>CKO* mouse brain by tiling and stitching of individual high-resolution images captured with a 63X objective lens (top panel). Images in the bottom panel were assembled from four tiles (images). Iba1 (green) and DAPI (blue). Scale bar: 200  $\mu$ m (whole scale), 10  $\mu$ m (ROI). **F**) High magnification of confocal images showing microglial morphology in WT and *TSC1<sup>Cx3cr1</sup>CKO* mice. Scale bar: 10  $\mu$ m. **G**) The gating strategy for the microglial population in FACS analysis.

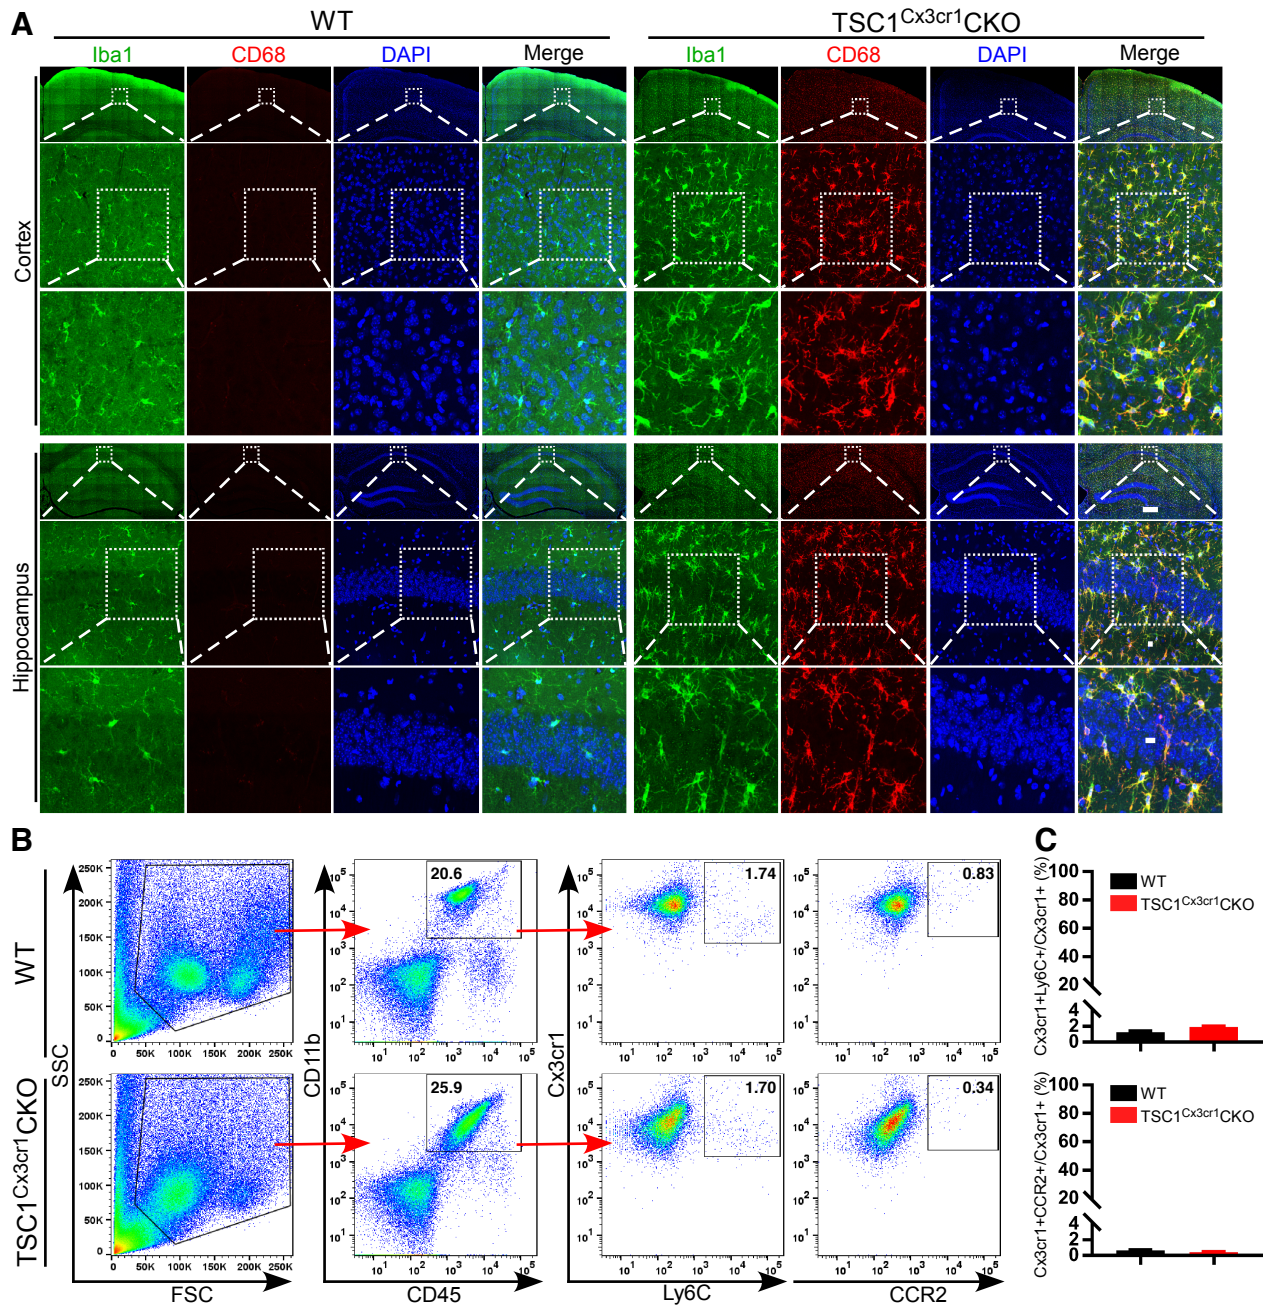

**Figure S2. Hyper-proliferation and induction of lysosomal genes in *TSC1*<sup>Cx3cr1</sup>CKO microglia, and FACs analysis of monocytes in mouse brains, Related to Figure 2.**

**A)** Brain coronal sections were stained with Iba1 (green), CD68 (red) and DAPI (blue). Representative images with entire cortical and hippocampal fields and high magnification of images from CTX and CA1. Scale bar: 200  $\mu$ m (whole scale), 10  $\mu$ m (ROI). **B)** The gating strategy for FACS analysis of monocytes in WT and *TSC1*<sup>Cx3cr1</sup>CKO mouse brains. **C)** Percentage of CD11b+/CD45+/Cx3cr1+/Ly6c and CD11b+/CD45+/Cx3cr1+/CCR2+ cell relative to the Cx3cr1+ population in WT (n=5; 3 males, 2 females) and *TSC1*<sup>Cx3cr1</sup>CKO (n=5; 3 males, 2 females) mice. There is no significant difference between WT and *TSC1*<sup>Cx3cr1</sup>CKO mice.

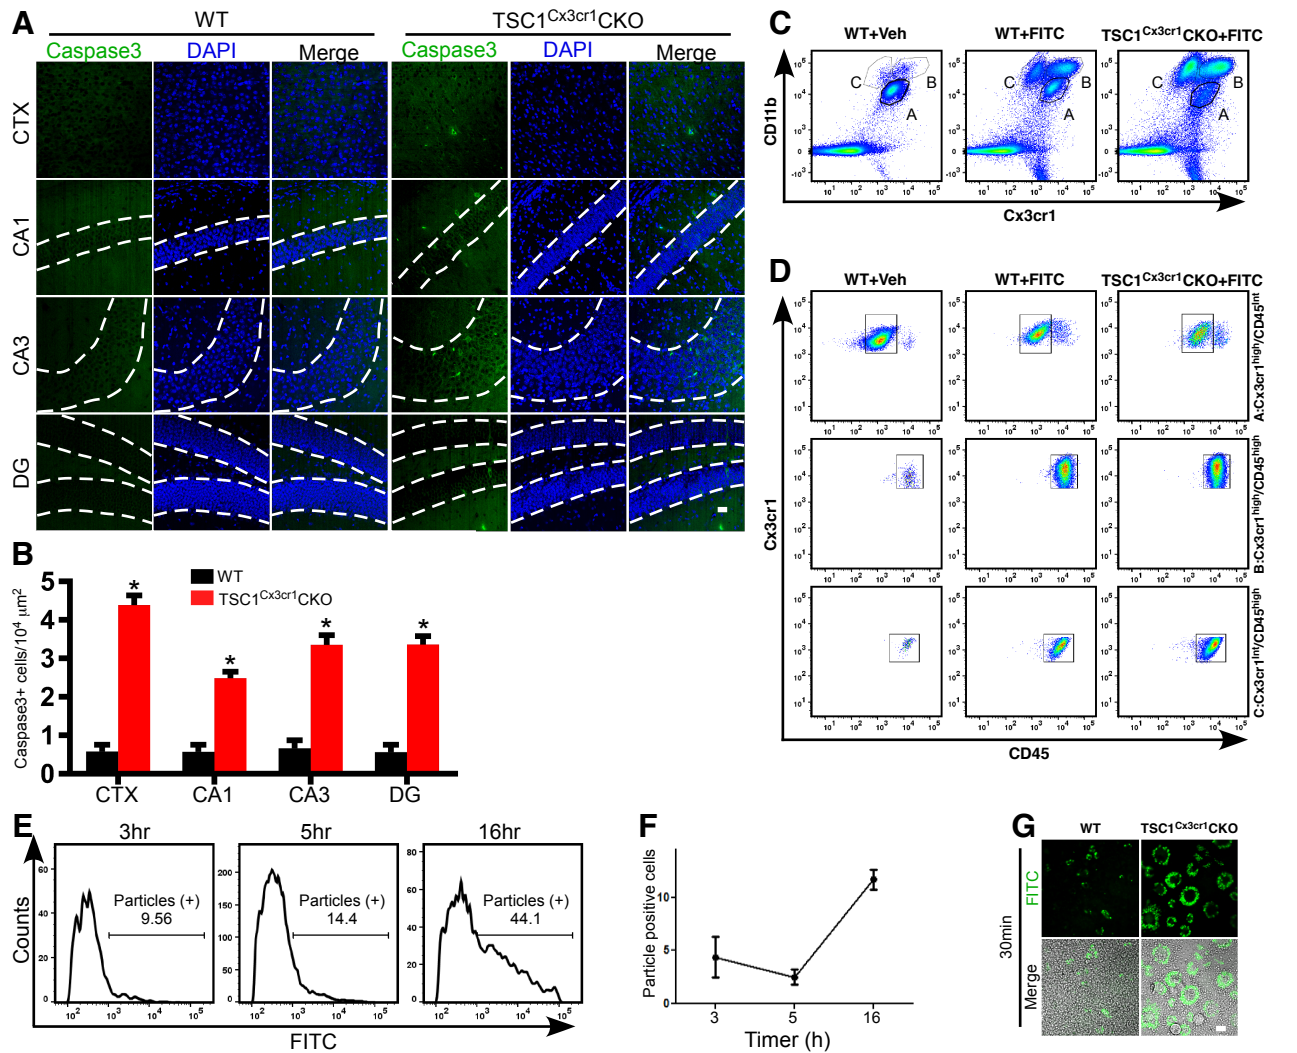

**Figure S3. Microglia phagocytosis analysis in vivo and in vitro, Related to Figure 3.**

**A)** Representative images showing positive staining of Caspase-3 (green) in the CTX and HIP of *TSC1<sup>Cx3cr1</sup>CKO* mice. Dotted lines mark the border of the pyramidal and granular layers. Scale bar: 20 μm. **B)** Quantification of Caspase 3 positive cells in the cortex (the M1 motor cortex) and hippocampus CA1 and CA3 pyramidal layers and dentate granular layer of WT (n=6; 3 males and 3 females) and *TSC1<sup>Cx3cr1</sup>CKO* (n=7; 3 males and 4 females) mice. \* p<0.05. **C)** The gating strategy for FACS analysis of the microglia population. Microglia were stained with CD11b, CD45, and Cx3cr1. Under CD11b and Cx3cr1 gating, three populations were identified, A: Cx3cr1<sup>high</sup>CD11b<sup>low/Int</sup>, B: Cx3cr1<sup>high</sup>CD11b<sup>high</sup>, and C: Cx3cr1<sup>low/Int</sup>CD11b<sup>high</sup>. The A and B sub-populations were mainly present in mouse brains injected with FITC-labeled zymosan bioparticles, but comprised a very small fraction in the brain injected with vehicle. **D)** Gating of A, B, C populations under Cx3cr1 and CD45 revealed that the A sub-population was mainly Cx3cr1<sup>high</sup>/CD45<sup>low/Int</sup>, whereas the B and C sub-populations were CD45<sup>high</sup>. Accordingly, sub-population A was used for quantification of uptake of FITC-particles. **E)** FACS analysis of microglial uptake of the FITC-labeled particles over time, with a significant elevation in uptake around 16 h following hippocampal injection of FITC-labeled particles. **F)** Plot of FITC-positive populations of microglia over time. Data were averaged from one pair of males and one pair of females of WT and *TSC1<sup>Cx3cr1</sup>CKO* mice. **G)** Representative high-magnification images showing in vitro uptake of pHrodo® Green zymosan bioparticles by microglia at the 30-min time point. Top: Green fluorescence channel; bottom: merge of green channel and DIC. Scale bar: 20 μm.

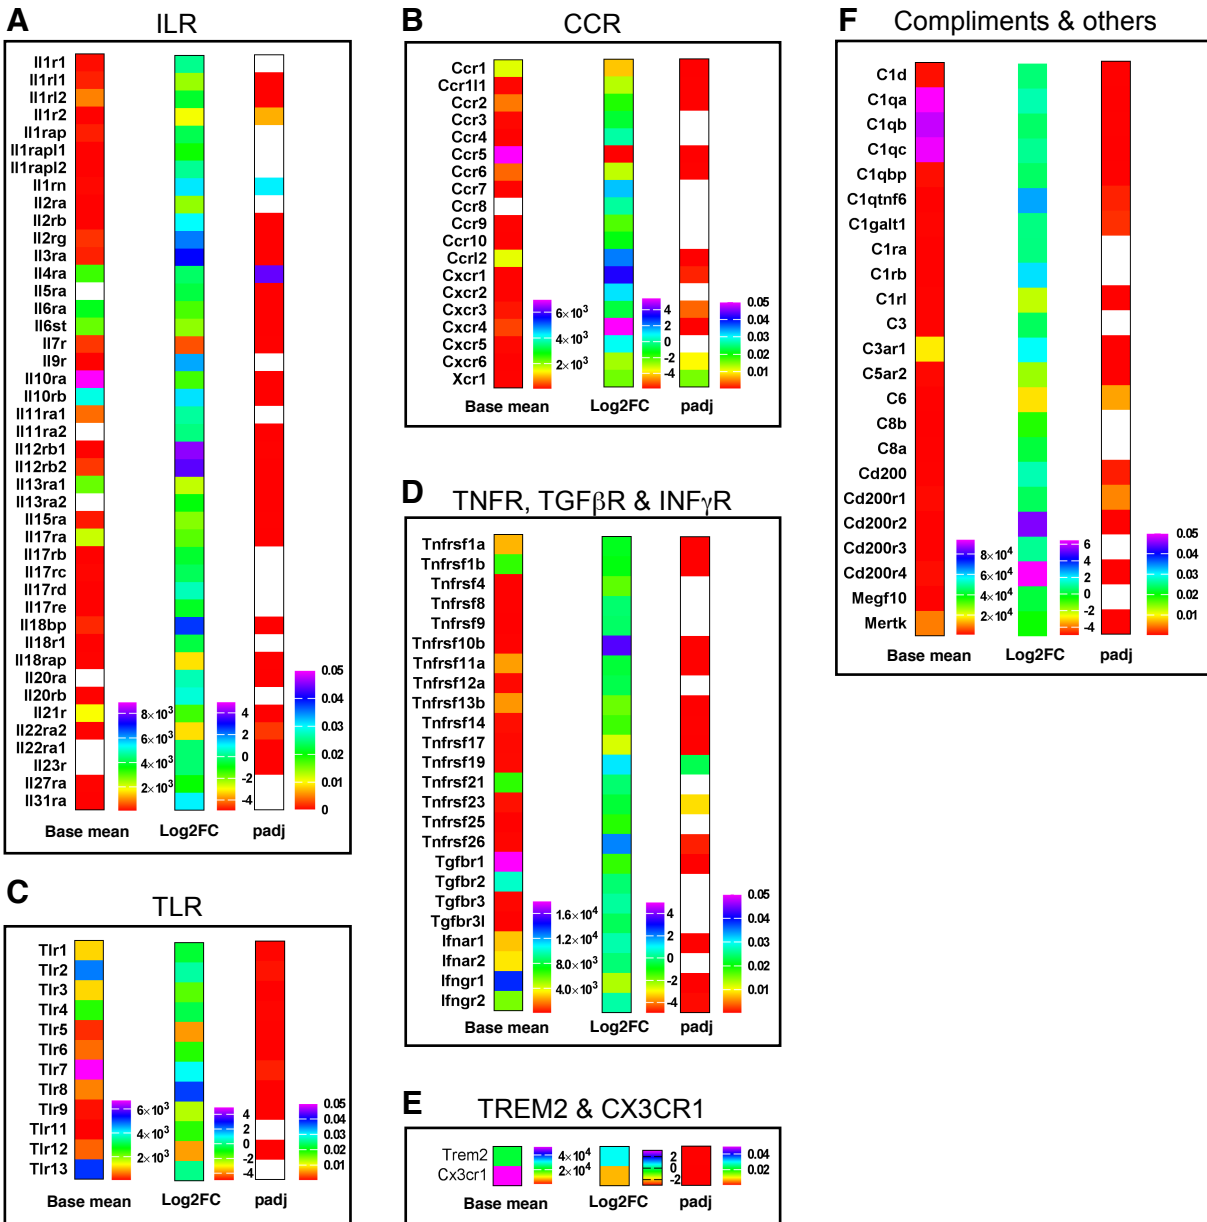

**Figure S4. Expression of cytokine/chemokine receptors, compliments and others, Related to Figure 4.**

A-D) Heatmap plot of ILR (A), CCR (B), TLR (C), and TNFR, TGFβR and Ifngr (D). E) Microglia express very high levels of Trem 2 and Cx3cr1. To better show the base levels of other genes, they were plotted separately from others. F) Heatmap plot of compliments, compliment receptors, and other genes involved in phagocytosis. Plot showing basal levels of gene expression in control microglia (Basemean), fold changes (Log2FC) in *TSC1*<sup>Cx3cr1</sup>CKO microglia, and p-values (padj) to evaluate the significance of the changes. Non color-filled spaces indicate their expression was either undetectable or padj value >0.05.

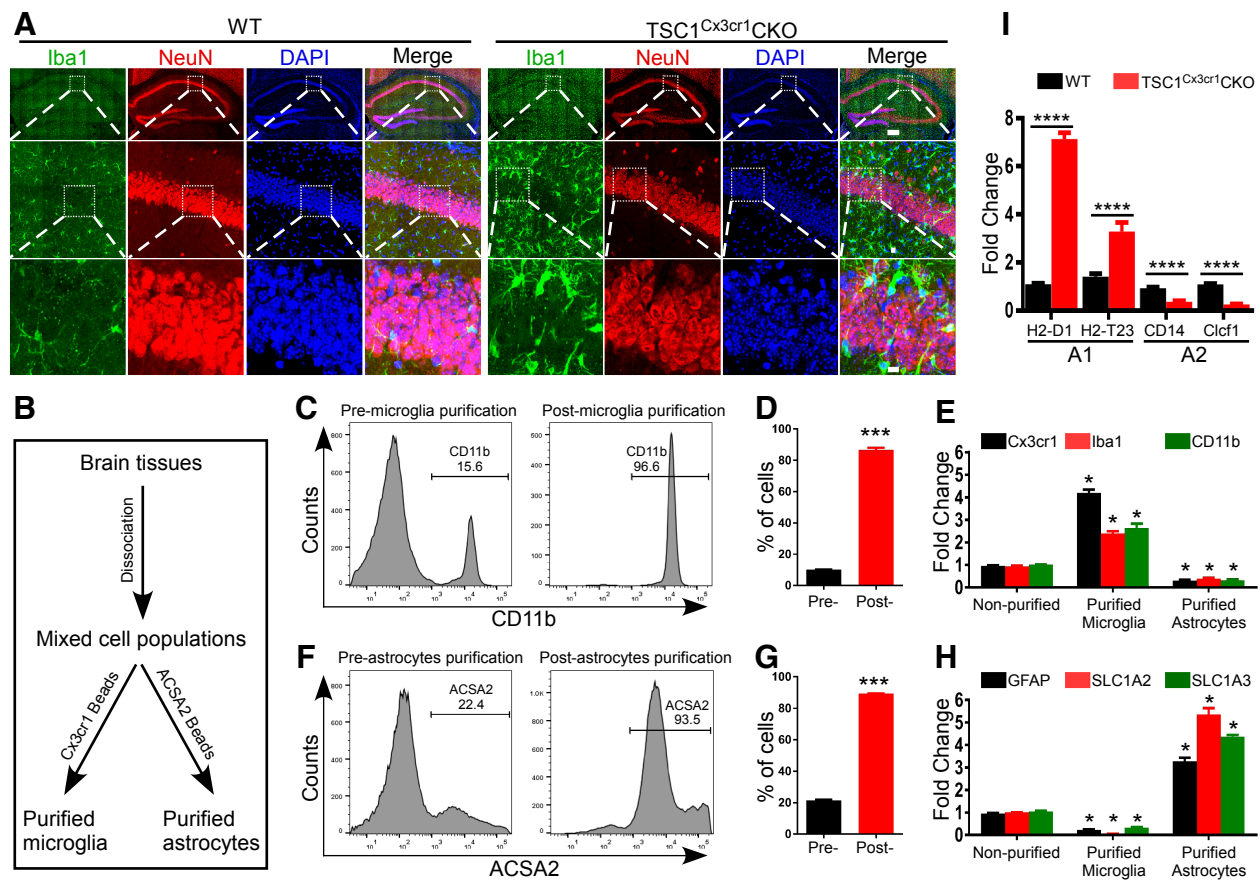

**Figure S5. Microglia infiltration into pyramidal and granular layers in *TSC1<sup>Cx3cr1</sup>CKO* mice, and purification of microglia and astrocytes, Related to Figure 2 & 5.**

**A**) Mouse brain coronal sections were triple-stained with anti-Iba1 (green), anti-NeuN (Red), and DAPI (blue). Representative images covering the entire hippocampus and high-magnification images of CA1 showing microglia infiltration into the pyramid layer in *TSC1<sup>Cx3cr1</sup>CKO* mouse brain. Scale bar: 200  $\mu$ m (whole scale), 10  $\mu$ m (ROI). **B-H**) Diagram showing the general strategy used to purify microglia and astrocytes from 4-5-week-old WT and *TSC1<sup>Cx3cr1</sup>CKO* mice using anti-Cx3cr1 and anti-ACSA2 magnetic beads respectively (B). Representative FACS analysis of microglial (C) and astrocyte (F) populations in dissociated cells prepared from mouse brain tissues. Purified microglial (D) and astrocyte (G) fractions. There was approximately 10- and 20-fold enrichment for astrocytes (H) and microglia (E), respectively. **I**) qRT-PCR analysis of the expression of A1-preferential genes (*H2-D1*, *H2-D23*) and A2-preferential genes (*S100a10*, *CD14*) in purified astrocytes prepared from WT (n=3; 2 males, 1 female) and *TSC1<sup>Cx3cr1</sup>CKO* (n=3; 2 males, 1 female) mice. t-test, \*\*\*\* indicates  $p < 0.0001$ . Data are presented as mean + SEM.

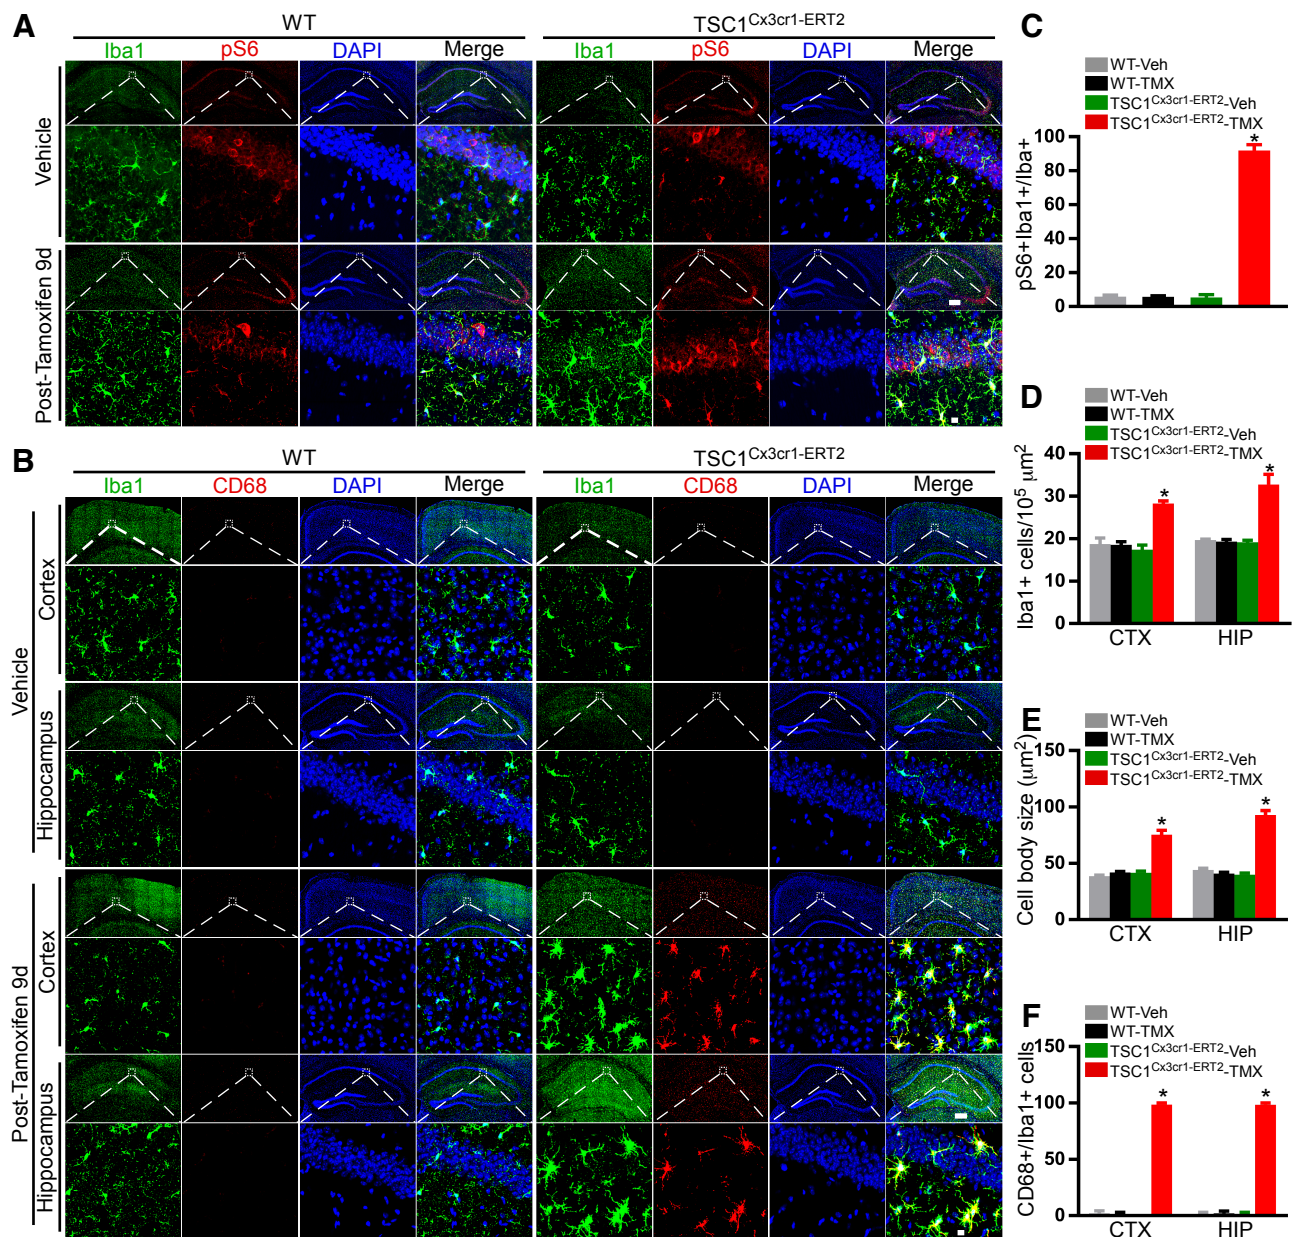

**Figure S6. Microglia hyper-proliferation and induction of CD68 in tamoxifen-treated *TSC1<sup>Cx3cr1-ERT2</sup>* mouse brains, Related to Figure 6.**

Mouse brains were harvested from WT and *TSC1<sup>Cx3cr1-ERT2</sup>* mice 9 days after treatment with either vehicle or tamoxifen at 100 mg/kg daily for 5 days. **A**) Mouse brain coronal sections were stained with anti-Iba1 (green), anti-pS6 (red), and DAPI (blue). Representative images with entire cortical and hippocampal fields and high magnification of images from cortex and hippocampal CA1. Increased levels of pS6 and co-localization of Iba1 and pS6 stainings in tamoxifen-treated *TSC1<sup>Cx3cr1-ERT2</sup>* mouse brain. Scale bar: 200 μm (whole scale), 10 μm (ROI). **B**) Mouse brain coronal sections were stained with anti-Iba1 (green), anti-CD68 (red), and DAPI (blue). Representative images showing entire cortical and hippocampal fields and high-magnification of images from cortex and hippocampal CA1. Increased levels of CD68 expression and co-localization of Iba1 and CD68 stainings in tamoxifen-treated *TSC1<sup>Cx3cr1-ERT2</sup>* mouse brain. Scale bar: 200 μm (whole scale), 10 μm (ROI). **C-F**) Quantification of the pS6 positive population (C), Iba1 positive population (D), cell-body sizes (E), and Iba1/CD68 double-positive population of microglia in WT and *TSC1<sup>Cx3cr1-ERT2</sup>* mice 9 days after tamoxifen treatment. There were four experimental groups and four animals per group: WT-vehicle (n=4; 2 male, 2 females), WT-Tamoxifen (n=4; 2 male, 2 females), *TSC1<sup>Cx3cr1-ERT2</sup>*-Vehicle (n=4; 2 male, 2 females), and *TSC1<sup>Cx3cr1-ERT2</sup>*-Tamoxifen (n=4; 2 male, 2 females). Data are presented as mean + SEM. One-way ANOVA test. P<0.01; Veh: Vehicle; TMX: Tamoxifen.

## Supplemental Experimental Procedures

### Animals

Animals were housed in a pathogen-free, temperature- and humidity-controlled facility with a 12-h light cycle (lights on at 7:00 A.M.) and given *ad libitum* access to food and water. All experiments were performed according to the guidelines set by the Institutional Animal Care and Use Committee as well as the National Institutes of Health *Guide for the Care and Use of Laboratory Animals*. Efforts were made to minimize suffering and unnecessary use of animals.

### Human brain specimens

All brain tissues were obtained from Albany Medical Center (Albany NY). Epilepsy surgical specimens were obtained from three patients, one male and two females, ranging from 10 to 48 years old. Control cortical tissues were obtained from autopsies of 3 patients who had no history of epilepsy and died of non-neurological causes with an average postmortem interval of 6 h. Brain slices were prepared from paraffin-embedded tissues sectioned at 5  $\mu\text{m}$ . Three slices per specimen were used for double staining of Iba1 (*Wako*, Cat# 019-19741, 1:200) and pS6 (*Cell signaling Inc.*, Cat# 4858S, 1:100). Three large images covering an area of 775  $\mu\text{m}$  X 775  $\mu\text{m}$  were randomly acquired from each slice using the tiles and positions module and a 25X water objective lens. Each tile represents a z-stack of six images at 0.5  $\mu\text{m}$  intervals acquired from a single position, and images (tiles) from a series of positions were stitched together, followed by maximal intensity projection to form a 2-D image. pS6 microglia tend to be proliferative, thus forming microglia patches. Microglia in the tiles (every single small image) with microglia patches were counted by an investigator blinded to the sample. All human tissues were obtained in accordance with a protocol approved by the Albany Medical College Institute Review Board and Committee on Human Research.

### Immunohistochemistry and acquisition of images

Animals were anesthetized with pentobarbital (100 mg/kg, i.p) and transcardially perfused with PBS followed by 4% paraformaldehyde (PFA) in PBS, pH7.4. Brains were post-fixed overnight in 4% PFA buffer, followed by cryoprotection in 30% sucrose in PBS for at least 48 h. Mouse brains were then embedded in Neg-50TM frozen section medium (*Fisher Scientific*), and sectioned on a cryostat at 35  $\mu\text{m}$  for all histological analyses unless otherwise described. Brain sections were washed with PBS, blocked and permeabilized in 10% BSA (*Sigma*) and 0.3% Triton X100 (*Sigma*) in PBS at room temperature for 2 h. For staining of activated caspase-3, brain sections were permeabilized with 0.5% Tween 20. Sections were incubated with primary antibodies overnight at 4  $^{\circ}\text{C}$ , and then washed with PBS for 5 min and repeated 3 times, followed by incubation with appropriate fluorescent-conjugated secondary antibodies for 2 h at room temperature. For staining of inhibitory synapses, brain sections were incubated in blocking buffer (0.2% Triton X-100 and 5% normal goat serum in 1XPBS) for 1 hr at RT, and then incubated in primary antibody solution (0.2% Triton X-100 and 3% normal goat serum in 1XPBS; anti-VGAT 1:4000, anti-Gephyrin 1:1000) at 4 $^{\circ}\text{C}$  for 48 hr. Brain sections were washed for 20 min for 3 times, followed by incubation of fluorophore-conjugated secondary antibodies at RT for 1 hr. Nuclei were counterstained with DAPI (*Sigma*) and coverslips were applied with Fluoromount G (*Southern Biotech*), and sealed with nail polish. All images were acquired using a Zeiss LSM 880 confocal microscope with Airyscan and processed with Zen black 2.1 or Zen blue lite 2.3 (*Carl Zeiss*). Immunofluorescence signals were quantified using the NIH image analysis software, ImageJ.

Brain coronal sections with similar anatomical locations (near bregma -2 mm position based on the mouse brain atlas) from control and *TSC1<sup>CX3CR1</sup>* CKO mice were selected for all histological analysis. To show the staining of microglia and astrocytes in the entire cortex and hippocampus, images were acquired using the tiles and positions module and a 25X water objective lens. Each tile represents a z-stack of six images at 1  $\mu\text{m}$  intervals acquired from a single position, and images (tiles) from a series of positions were stitched together, followed by maximal intensity projection to form a 2-D image as presented.

For the quantification of microglia density, brains were stained with Iba1 (*Wako*), CD68 (*Bio-Rad*), and DAPI (*Sigma*). Confocal image stacks were collected using a 25X water objective lens with a 1- $\mu\text{m}$  interval through a 10- $\mu\text{m}$  z-depth of the tissue under the tiles and stitching mode covering an area of 1656  $\mu\text{m}$  X 3250  $\mu\text{m}$ . The image stacks were subjected to maximum intensity projection to create 2D images and then imported into NeuroLucida software (*MBF Bioscience*, Williston, VT) for cell number counting. Microglia within the areas of the M1 motor cortex around layer IV, the hippocampal radiatum layer adjacent to pyramidal CA1, stratum lucidum adjacent to

CA3, and dentate hirus (hereafter referred to as cortex, CA1, CA3, and DG) were quantified. Data are presented as the number of Iba1 or CD68 positive cells per  $10^5 \text{ mm}^2$ .

For the analysis of microglia morphology, confocal image stacks were collected using a 63X objective lens with a 0.5- $\mu\text{m}$  interval through a 10- $\mu\text{m}$  z-depth of the tissue. The image stacks were processed by maximum intensity projection to create 2D images. The 2D images were then imported into Zen blue lite 2.3 program (*Carl Zeiss, Oberkochen, Germany*). Cell body sizes were measured using “Draw Spline Contour” in the “Graphics” section. Microglia were divided into three groups: ramified, bushy, and amoeboid. The ramified group was defined as cells having at least one microglial process at least 3X longer than the size of the cell body. Cells with processes less than 3X but longer than 1.5X the cell body were classified as bushy, and cells with still shorter processes were classified as amoeboid.

For the quantification of hippocampal infiltration by microglia, brain coronal sections were triple-stained with anti-Iba1 (*Wako, Cat# 019-19741*), anti-NeuN (*EMD Millipore*), and DAPI. Images were acquired using a 25X water objective lens with a 1- $\mu\text{m}$  interval through a 10- $\mu\text{m}$  z-depth of the tissue under the tiles and stitching mode covering an area of 1656  $\mu\text{m}$  X 3250  $\mu\text{m}$ . Microglia with identifiable soma and localized within pyramidal layers CA1 and CA3, the granular layer of the DG, or on the border but closely adjacent to either pyramidal or granular cells, were counted.

To quantify the phagocytosis of dying cells, apoptotic cells and microglia were labeled by anti-activated caspase-3 (*Cell Signaling Inc, Cat#9669*) and anti-Iba1 (*Wako, Cat# 013-26471*), respectively. Three coronal 35- $\mu\text{m}$  sections that were approximately 105  $\mu\text{m}$  apart from each other (every 4<sup>th</sup> section) from similar anatomical locations of each mouse brain (near bregma -2 mm position based on the mouse brain atlas) were selected for histological analysis. Brain sections were prepared from 6 controls and 7 *TSCI<sup>CX3CR1</sup>*CKO mice. Confocal image stacks were acquired using a 63X objective lens with a 0.5- $\mu\text{m}$  interval through a 10- $\mu\text{m}$  z-depth of the tissue. The entire CA1 region was scanned using the tiles and positions module under a 63X objective lens. Each tile represents a z-stack from a single position, and images (tiles) from a series of positions were stitched together, followed by maximal intensity projection to form a 2-D image covering the entire CA1 region. All Cas3 positive cells within the CA1 pyramidal layer were identified and classified into three types: non-contact, contact, and wrapped (or phagocytic cup). “Wrapped” was defined as having more than 30% of soma of dying cells (positively stained with caspase-3) surrounded by soma and/or processes of microglia (positively stained with Iba1). ‘Contact’ was defined as dying cells showing slight contact (and less than 30%) with the soma of microglia. Individual dying cells that were clearly isolated from the soma of microglia were classified as ‘non-contact’ cells. Images were analyzed using Image J by an investigator blinded to the samples. For the quantification of Cas3 positive cells, confocal image stacks were collected using a 25X water objective lens with a 1- $\mu\text{m}$  interval through a 10- $\mu\text{m}$  z-depth of the tissue under the tiles and stitching mode covering an area of 1656  $\mu\text{m}$  X 3250  $\mu\text{m}$ . The image stacks were subjected to maximum intensity projection to create 2D images and then imported into NeuroLucida software (*MBF Bioscience, Williston, VT*) for cell number counting. Cas3 positive cells within the areas of the M1 motor cortex around layer IV, the hippocampal radiatum layer adjacent to pyramidal CA1, the stratum lucidum adjacent to CA3, and the dentate hirus (hereafter referred to as cortex, CA1, CA3, and DG) were quantified. Data are presented as the number of Cas3 positive cells per  $10^5 \mu\text{m}^2$ .

Synapses were quantified according to the protocol previously described (Shi et al., 2015). Brain tissues were sectioned at 15- $\mu\text{m}$  thickness. Three sections at equidistant planes (100  $\mu\text{m}$  apart) per mouse were used for subsequent co-immunostaining with antibodies against the pre-synapse protein VGlut2 (*EMD Millipore*) and the post-synapse protein Homer1 (*EMD Millipore*) for excitatory synapses, and the pre-synapse protein VCAT (Synaptic Systems) and the post-synapse protein Gephyrin (Synaptic Systems) for inhibitory synapses. The stained sections were imaged within 48 h of staining with a 63X Zeiss pan-Apochromat oil, 1.4 NA objective lens on a Zeiss LSM 880 with the Airyscan protocol in super-resolution mode. Two images with maximum synaptic staining within a z-stack of 21 serial optical frames (0.3  $\mu\text{m}$  interval) were selected for quantification. Six single images per mouse brain were analyzed. Synapses were identified as yellow punctae, which represent the co-localization of VGlut2 (green) and Homer1 (red) or VCAT (green) and Gephyrin (red). The number of synapses in the areas including the M1 motor cortex around layer IV, the hippocampal radiatum layer adjacent to pyramidal CA1, the stratum lucidum adjacent to CA3, and the dentate hirus were counted using Image J software (version 1.51f, *NIH*).



All cell number counting and analysis of phagocytosis synapse density were performed by an investigator blinded to the samples.

### **Primary microglia culture**

Forebrains were removed from postnatal day 1 or 2 (P1 or P2) mice, placed in dissection buffer (PBS plus 5% FBS) on ice, transferred to a 60-mm dish after stripping of the meninges and choroid plexus membranes, then minced with sterilized razor blades (*Stanley*). The cell suspensions from every two mice were transferred to a 50 ml Falcon tube, brought to volumes of 10-15 ml, and fully dissociated by pipetting up and down with 1-ml and 200- $\mu$ l pipet tips for 10 rounds. The cell suspensions were then passed through a 40- $\mu$ m cell strainer (*BD Falcon*), centrifuged at 300 x g for 5 min. The cell pellets were resuspended in culture medium (DMEM + 10% FBS + Penicillin/Streptomycin) to yield the mixed glial cell suspension. The mixed glial cells were then seeded into poly-D-lysine pre-coated T75 tissue culture flasks (roughly two brains/flask). Four days after initial seeding, the medium was replaced every 4 days with culture medium supplemented with 5 ng/ml macrophage colony-stimulating factor (M-CSF; *Shenandoah Biotechnology*). Microglia were collected on day in vitro (DIV) 12 by shaking the flasks at 125 rpm in a regular cell-orbital shaker at 37 °C for 4-5 h. The floating cells in the supernatant were counted, pelleted at 500 x g for 5 min, then resuspended in culture medium, followed by plating on poly-D-lysine-coated 12-well plates or 35-mm dishes. After seeding, the microglia were allowed to attach to the plate for 1 h. The plating medium was then removed and the plates were rinsed once with the pre-warmed culture medium to remove non-adherent cells. The primary microglia were used either for assays one week after plating or detached and re-seeded for in vitro phagocytosis assay.

### **In vitro phagocytosis assay**

The cultured microglia were seeded into poly-D-lysine-coated 35-mm culture dishes with glass-bottoms at  $0.5 \times 10^5$  cells/dish (*MatTek*, P35G-1.0-14-C) 1-2 days prior to the assay. pHrodo® Green zymosan bioparticles (*ThermoFisher*, P35365) were dissolved at 0.5 mg/mL in phenol red-free DMEM (*Life Technologies*, 31053-028), vortexed and sonicated to homogeneously disperse the particles immediately before the assay. Prior to live imaging, the culture medium was removed and the culture dish was washed once with pre-warmed phenol red-free DMEM and then 100  $\mu$ l of bioparticle suspension was added to the area with the glass-bottom. The microscope stage incubator was pre-set to 37 °C and the environmental chamber filled with 5% CO<sub>2</sub>. Immediately following the addition of the bioparticles, a series of image frames was acquired at 1 frame/min for 61 cycles with the green fluorescence channel and DIC using a 63X oil objective. Phagocytic particles were manually counted.

### **Treatment of cultured microglia with interferon stimulatory DNA (ISD)**

ISD is a 45-bp double-stranded oligomer (*In vivo Gen*, Cat#: tlr1-isdn). We used ISD to model the DNA-mediated inflammatory response in microglia. Briefly, the cultured microglia were plated in triplicate for each time point into poly-D-lysine-coated 12-well plates at  $1 \times 10^5$  cells/dish (*MatTek*, Cat#: P35G-1.0-14-C) 3 days prior to the assay. ISD and lipofectamine 2000 were diluted at 1  $\mu$ g/50  $\mu$ l and 1  $\mu$ l/50  $\mu$ l, respectively, in opti-MEM medium (*Life Technologies*, Cat #31985-070) according to the manufacturer's instructions (*Life Technologies*, Cat #11668027) and then incubated at room temperature for 20 min, followed by addition of 50  $\mu$ l of ISD mixture to each well with approximately 500  $\mu$ l of existing microglial culture medium. ISD-treated microglia cultures were incubated at 37 °C for 4 and 9 h. Prior to harvesting RNA from microglia, the culture medium was removed and the cells were rinsed once with PBS. Total RNA samples from each well were extracted by adding 1 ml of Trizol reagent (*Life Technologies*, Cat#15596026). RNA preparations were dissolved in water and either used immediately or stored at -80°C.

### **Purification of microglia and astrocytes from mouse brains**

Mice were anesthetized with pentobarbital (100 mg/kg, i.p) and quick-perfused with 30 ml PBS without Ca<sup>2+</sup> and Mg<sup>2+</sup>. Mouse brains were dissected into 5-ml round-bottom tubes (1 brain/tube) (*Falcon*, Cat#: 352058) pre-filled with 1 ml serum-free medium (DMEM/F12 with 4.5 mg/ml glucose) and 1 ml dissociation medium (DMEM/F12 plus 1 mg/ml papain and 1.2 U/ml dispase II, and DNase I to 20 U/ml) prepared immediately before use, and homogenized using a 3-ml syringe plunger (*BD Bioscience*, Cat#: 309656). After adding an additional 2 ml of dissociation medium, the suspension was transferred into a new 15-ml tube and incubated at 37 °C for 10 min. Then 3 ml of neutralization medium (DMEM/F12 with 4.5 mg/ml glucose and 10% FBS) was added to each tube to stop the digestion. The suspension was further dissociated by pipetting up and down for 10-15 rounds with a 1-ml pipet tip touching the bottom of the 15-ml tube, and then passed through a 30- $\mu$ m cell strainer (*Miltenyi*, Cat#: 130-041-

407). Myelin was removed by adding an equal volume of 70% percol followed by centrifugation at 800 x g at 4 °C for 15 min. Cells were washed once with FACS buffer (1% BSA, 0.1% sodium azide, 2 mM EDTA in PBS, pH 7.4), and then processed for FACS analysis of microglia or further purification of microglia and astrocytes.

For the in vivo phagocytosis assay, FITC-labeled zymosan particles were dissolved in PBS with Ca<sup>2+</sup> and Mg<sup>2+</sup> at 50 µg/ml and vortexed vigorously (15 seconds for three times at the highest setting) to disperse the particles. Then 0.5 µl of the particle suspension was infused into the hippocampus via cannula with coordinates AP = -2.0 mm; ML = ±1.6 mm; and DV = -1.5 mm. Sixteen hours later, the mouse brains were perfused with PBS. Microglia were purified by the percol method, stained and analyzed by FACS analysis.

For FACS analysis of microglia, cells were resuspended in 50 µl FACS buffer (1% BSA, 2 mM EDTA and 0.1% sodium azide in PBS, pH 7.4) (5-10 × 10<sup>5</sup> cells/tube) and incubated on ice for 10 min with anti-mouse CD16/CD32 (*Biological*) at 1:50 dilution to block Fc receptors. Cells were washed with 500 µl of ice-cold FACS buffer twice to remove unbound anti-CD16/CD32 prior to cell-surface or intracellular staining. To evaluate microglia size, microglia preparations were aliquoted in 10<sup>6</sup> cells/50 µl and stained with anti-Cx3cr1-APC (*Biological*), anti-CD11b-PE/Dazzle™ 594 (*Biological*), anti-CD45-PerCP/Cy5.5 (*Biological*) at 1:100 dilution on ice for 30 min to label surface markers. Stained cells then were washed with 500 µl of ice-cold FACS buffer twice to remove unbound antibodies and analyzed immediately by LSR II Flow Cytometer (*BD Biosciences*). To evaluate microglial activation, additional intracellular staining of CD68 was applied to microglia preparations. Briefly, immediately after surface-staining with anti-Cx3cr1-APC, anti-CD11b-PE/Dazzle™ 594, and anti-CD45-PerCP/Cy5.5, the cells were fixed and permeabilized using a Fixation/Permeabilization Solution Kit with BD GolgiPlug (BD, Cat# 555028) according to the manufacturer's instructions, followed by staining with anti-CD68-AF488 (*Biological*) at 1:1000 dilution on ice for 30 min. Cells were washed in FACS buffer twice on ice for 5 min and immediately followed by FACS analysis. Microglia populations were identified as double-positive for CD11b and Cx3cr1 with low-to-intermediate CD45. For FACS analysis of infiltrated monocytes, cells were prepared from 4-week-old control and *TSC1<sup>CX3CR1</sup>*CKO mice. They were stained with anti-CD11b-PE/Dazzle™ 594 (*Biological*, Cat#101255), anti-CD45-PerCP/Cy5.5 (*Biological*, Cat#103132), anti-Cx3cr1-APC (*Biological*, Cat#149008), anti-CCR2-FITC (*Biological*, Cat#150607), and anti-Ly6c-Pacific Blue (*Biological*, Cat#128013) for detection.

### **Purification of microglia and astrocytes**

We utilized anti-Cx3cr1-PE antibody (*Biological*) to bind microglia and anti-ACSA-2-PE (*Miltenyi*) to bind astrocytes, followed by addition of anti-PE MicroBeads (*Miltenyi*, Cat#: 130-105-639) to capture bound cells. The entire procedure was based on the manufacturer's instructions. Briefly, dissociated cells (~10<sup>7</sup>) were resuspended in 50 µl FACS buffer (1% BSA, 0.1% sodium azide, 2 mM EDTA in PBS, pH 7.4), followed by addition of 1 µl anti-mouse CD16/CD32 (*Biological*) and incubation on ice for 10 min to block Fc receptors. The cells were then incubated with primary PE-conjugated antibody according to the manufacturer's recommendations. After washing the cells twice with FACS buffer, the cells were resuspended in 80 µl FACS buffer and 20 µl anti-PE MicroBeads, and incubated at 4 °C for 15 min. The cells were further diluted in 500 µl FACS buffer and passed through a magnetic MS column (*Miltenyi*, Cat#: 130-042-201). After three washes of the column with FACS buffer, the MS column was moved away from the magnetic field to elute the cells from the column with 1 ml FACS buffer. Astrocytes were purified using an anti-ACSA-2 microBead Kit (*Miltenyi*, Cat#: 130-097-678). Purified cells were pelleted by centrifugation at 800 x g at 4 °C for 10 min. The yielded cells were then used immediately for total RNA isolation.

### **Tamoxifen treatment**

Tamoxifen (Sigma-Aldrich, Cat#T5648) was dissolved in corn oil (Sigma-Aldrich, Cat#C8267) at a concentration of 20 mg/ml by shaking overnight at 37°C. Dissolved tamoxifen was stored at 4°C for the duration of injections. Cx3cr1-CreERT2<sup>+/+</sup> and Cx3cr1-CreERT2<sup>+/+</sup>-*TSC1<sup>fl/fl</sup>* mice at 8-10-week-old of age were injected (i.p) with tamoxifen daily at 100 mg/kg body weight for 5 consecutive days.

### **RNA isolation, RT-PCR, Real-time PCR, and RNAseq**

Total RNA was extracted from purified microglia and cultured microglia using TRIzol Reagent (*Life Technologies*, Cat#: 15596026) according to the manufacturer's instructions. To isolate RNA from brain tissues, mouse brains were first perfused with 50 ml of PBS prior to dissection of the cortex and hippocampus. Dissected cortical and hippocampal tissues were briefly homogenized in TRIzol Reagent, followed by RNA extraction. To better recover

total RNA from purified microglia and astrocytes, additional 0.5  $\mu$ l RNase-free glycogen at 20  $\mu$ g/ml (Roche, Cat#10901393001) was added to 0.5 ml TRIzol extraction prior to RNA precipitation with isopropanol. RNA pellets were resuspended in 50  $\mu$ L of RNase-free water (Fisher Scientific, Cat#BP561-1) and incubated at 55°C for 10 min. RNA concentrations were determined by SmartSpec Plus Spectrophotometer (Bio-Rad). cDNA was synthesized from 0.2-1  $\mu$ g of total RNA via reverse transcription using a Verso cDNA Synthesis Kit (Thermo Scientific, Cat#: AB-1453/B) in a total volume of 20  $\mu$ l. The cDNA templates were further diluted 2-3 times in water. Two microliters of diluted templates were used for Real-time PCR. RT-PCR was performed in a 96-well PCR plate (Bio-Rad, MLL9601) using a SYBR Green qPCR Master Mix kit (Applied Biosystems, Cat#: A25777) in a Step One Plus Real-time PCR System (Applied Biosystems). Each sample was evaluated in triplicate. The CT value was used to calculate the fold change of RNA abundance after normalization to GAPDH. All primer sequences are provided in supplemental Table S2.

Four sets of total RNA samples prepared from control and *TSCI<sup>Cx3cr1</sup>* CKO mouse brains were submitted to the University of Rochester Medical Center's Genomics Research Center for RNA-Sequencing (RNA-seq). The entire RNAseq process was performed as described previously (Wong et al., 2018). Briefly, all four sets of samples passed RNA quality control with RNA Integrity Number (RIN) >7. One nanogram of RNA was used for low input RNAseq library construction and sequencing. cDNA quantity and quality were determined using a Qubit Fluorometer (Life Technologies) and Agilent 2200 TapeStation, respectively. Sequencing libraries were generated from 5 ng cDNA with the NexteraXT library prep kit (Illumina). Libraries were sequenced (single end reads) on an Illumina HiSeq 2500v4 SER100 high-throughput DNA sequencer (Illumina). Single-end reads of 100nts were generated. The primary data analysis for differential expression was completed using DeSeq2-1.10.1 by the genomics core. The derived DeSeq2 data were further analyzed using iPathway Guide (Advaita). The heatmap diagram was produced either using iPathway Guide or GraphPad Prism5. The RNAseq data was deposited in NCBI's Gene Expression Omnibus (GSE108625).

#### **Video/EEG recording of spontaneous seizures**

Video/EEG recording was done according to previously published work (McMahon et al., 2012). 22- to 25-day-old control (*Cx3cr1-Cre* +/-, 5 males and 5 females) and *TSCI<sup>Cx3cr1</sup>* KO mice (5 males and 5 females) were implanted epidurally with three-channel EEG electrodes (Plastics One, Cat#: MS333/3-AIU/SPC). Mice were monitored using a video/EEG system (DataWave Technologies) 24 h per day for up to 5 weeks. All video/EEG data were manually analyzed by trained researchers blinded to the genotypes. EEG seizure events were characterized by the sudden onset of high-frequency and high-amplitude (>2X background) activity and a duration greater than 10 seconds, along with characteristic postictal suppression. All electrographic seizures were verified behaviorally by video data to exclude movement artifacts. For seizure monitoring in *Cx3cr1-CreERT2* +/- and *Cx3cr1-CreERT2* +/- *TSCI<sup>f/f</sup>* mice, EEG electrodes were implanted 2-3 days prior to Tamoxifen treatment. Video/EEG recording began immediately after cessation of tamoxifen treatment and continued for up to 26 days.

**Statistical analysis:** Data were analyzed using Graphpad Prism 7 software with appropriate tests for comparisons between wildtype and *TSCI<sup>Cx3cr1</sup>* CKO mice. Student's t test was used to test the differences between two groups. A two-way ANOVA followed by Tukey's multiple comparisons was used to examine the differences among multiple groups. Log-rank (Mantel-Cox) test was used to analyze the rates of spontaneous seizures and mortality. Mann-Whitney test was employed to test the difference in seizure frequency and duration. A p value of < 0.05 was considered significant. Data are shown as the mean  $\pm$  SEM.

#### **References:**

- McMahon, J., Huang, X., Yang, J., Komatsu, M., Yue, Z., Qian, J., Zhu, X., and Huang, Y. (2012). Impaired autophagy in neurons after disinhibition of mammalian target of rapamycin and its contribution to epileptogenesis. *The Journal of neuroscience* 32, 15704-15714.
- Shi, Q., Colodner, K.J., Matousek, S.B., Merry, K., Hong, S., Kenison, J.E., Frost, J.L., Le, K.X., Li, S., Dodart, J.C., et al. (2015). Complement C3-deficient mice fail to display age-related hippocampal decline. *The Journal of neuroscience*:35, 13029-13042.

Wong, E.L., Lutz, N.M., Hogan, V.A., Lamantia, C.E., McMurray, H.R., Myers, J.R., Ashton, J.M., and Majewska, A.K. (2018). Developmental alcohol exposure impairs synaptic plasticity without overtly altering microglial function in mouse visual cortex. *Brain Behav Immun* 67, 257-278.

**Table S1: Key resources, Related to Experimental Procedures.**

| REAGENT or RESOURCE                                                                         | SOURCE                | IDENTIFIER |
|---------------------------------------------------------------------------------------------|-----------------------|------------|
| <b>Antibodies</b>                                                                           |                       |            |
| Anti Iba1                                                                                   | Wako                  | 019-19471  |
| anti-mouse CD16/32                                                                          | BioLegend             | 101302     |
| PE/Dazzle(TM) 594 anti-mouse/human CD11b                                                    | BioLegend             | 101255     |
| PerCP/Cy5.5 anti-mouse CD45                                                                 | BioLegend             | 103132     |
| Rat Anti-Mouse CD68                                                                         | Bio-Rad / AbD Serotec | MCA1957    |
| Alexa Fluor 488 anti-mouse CD68                                                             | BioLegend             | 137012     |
| Cleaved Caspase-3 (Asp175) Antibody (Alexa Fluor(R) 488 Conjugate)                          | Cell Signaling        | 9669       |
| Anti Iba1, Rabbit, Red Fluorochrome(635)-conjugated                                         | Wako                  | 013-26471  |
| APC anti-mouse CX3CR1                                                                       | BioLegend             | 149008     |
| Anti-NeuN                                                                                   | Millipore             | MAB377     |
| Anti-Glial Fibrillary Acidic Protein                                                        | Millipore             | AB5541     |
| GOAT IGG FRACTION TO MOUSE COMPLEMENT C3                                                    | MP Biomedicals        | 855463     |
| Anti-VGluT2                                                                                 | Millipore             | AB2251-I   |
| Anti-Homer1                                                                                 | Millipore             | ABN37      |
| Anti VGAT                                                                                   | Synaptic Systems      | 131011     |
| Anti Gephyrin                                                                               | Synaptic Systems      | 147008     |
| Goat Polyclonal anti Iba1                                                                   | Novus Biologicals     | NB100-1028 |
| PE anti-mouse CX3CR1                                                                        | BioLegend             | 149006     |
| Rabbit Anti-S6 Ribosomal Protein                                                            | Cell Signaling        | 2217       |
| Phospho-S6 Ribosomal Protein (Ser235/236) (D57.2.2E)                                        | Cell Signaling        | 4858       |
| Hamartin/TSC1 Antibody                                                                      | Cell Signaling        | 4906       |
| GAPDH (D16H11) XP Rabbit mAb antibody                                                       | Cell Signaling        | 5174       |
| Phospho-S6 Ribosomal Protein (Ser240/244) (D68F8) XP Rabbit mAb (Alexa Fluor 488 Conjugate) | Cell Signaling        | 5018S      |
| Cleaved Caspase-3 (Asp175) Antibody                                                         | Cell Signaling        | 9661       |
| Goat anti-Rabbit IgG (H+L) Secondary Antibody, Alexa Fluor 488 conjugate                    | ThermoFisher          | A-11034    |
| Goat anti-Rabbit IgG (H+L) Highly Cross-Adsorbed Secondary Antibody, Alexa Fluor 568        | ThermoFisher          | A-11036    |
| Goat anti-Rat IgG (H+L) Cross-Adsorbed Secondary Antibody, Alexa Fluor 555                  | ThermoFisher          | A-21434    |
| Goat anti-Mouse IgG (H+L) Highly Cross-Adsorbed Secondary Antibody, Alexa Fluor 568         | ThermoFisher          | A-11031    |
| Goat anti-Chicken IgY (H+L) Secondary Antibody, Alexa Fluor 488                             | ThermoFisher          | A-11039    |
| Donkey anti-Goat IgG (H+L) Cross-Adsorbed Secondary Antibody, Alexa Fluor 568               | ThermoFisher          | A-11057    |
| Goat anti-Guinea Pig IgG (H+L) Highly Cross-Adsorbed Secondary Antibody, Alexa Fluor 568    | ThermoFisher          | A-11075    |
| Donkey anti-Goat IgG (H+L) Cross-Adsorbed Secondary Antibody, Alexa Fluor 647               | ThermoFisher          | A-21447    |
| Anti-rabbit IgG, HRP-linked Antibody                                                        | ThermoFisher          | 7074       |
| <b>Chemicals, Peptides, and Recombinant Proteins</b>                                        |                       |            |
| DMEM                                                                                        | Corning               | 10013-CV   |
| Phenol red-free DMEM                                                                        | Life technologies     | 31053-028  |
| DMEM/F12                                                                                    | Gibco                 | 11039-021  |
| Mouse M-CSF                                                                                 | SHENNANDOAH           | 200-08     |

|                                                                     |                   |                                                                                                                        |
|---------------------------------------------------------------------|-------------------|------------------------------------------------------------------------------------------------------------------------|
| Percol                                                              | GE Healthcare     | 17-0891-01                                                                                                             |
| Papain                                                              | Sigma             | P3125                                                                                                                  |
| Dispase II                                                          | STEMCELL          | 07913                                                                                                                  |
| ISD Naked                                                           | InvivoGen         | tlrl-isdn                                                                                                              |
| Bovine Serum Albumin                                                | Sigma             | A7030                                                                                                                  |
| TRIzol                                                              | Life technologies | 15596018                                                                                                               |
| pHrodo™ Green Zymosan Bioparticles™ Conjugate for Phagocytosis      | ThermoFisher      | P35365                                                                                                                 |
| Zymosan A (S. cerevisiae) BioParticles™, Alexa Fluor™ 488 conjugate | ThermoFisher      | Z23373                                                                                                                 |
| <b>Critical Commercial Assays</b>                                   |                   |                                                                                                                        |
| Verso cDNA Synthesis Kit                                            | ThermoFisher      | AB1453B                                                                                                                |
| PowerUp™ SYBR™ Green Master Mix                                     | ThermoFisher      | A25777                                                                                                                 |
| Fixation/Permeabilization Solution Kit with BD GolgiPlug™           | BD Bioscience     | 555028                                                                                                                 |
| <b>Other materials</b>                                              |                   |                                                                                                                        |
| Anti-PE MicroBeads                                                  | Miltenyi          | 130-105-639                                                                                                            |
| MS Columns                                                          | Miltenyi          | 130-042-201                                                                                                            |
| Pre-Separation Filters (30 µm)                                      | Miltenyi          | 130-041-407                                                                                                            |
| Anti-ACSA-2 MicroBead Kit, mouse                                    | Miltenyi          | 130-097-678                                                                                                            |
| Three-channel EEG electrodes                                        | Plastic ONE       | MS333/3-AIU/SPC                                                                                                        |
| Falcon® 40µm Cell Strainer                                          | Corning           | 352340                                                                                                                 |
| <b>Software and Algorithms</b>                                      |                   |                                                                                                                        |
| ImageJ                                                              | NIH               | <a href="https://fiji.sc/">https://fiji.sc/</a> or <a href="https://imagej.nih.gov/ij/">https://imagej.nih.gov/ij/</a> |
| GraphPad Prism 7.0                                                  | GraphPad Software | <a href="https://www.graphpad.com">https://www.graphpad.com</a>                                                        |
| Zen Black                                                           | Zeiss             | <a href="https://www.zeiss.com">https://www.zeiss.com</a>                                                              |
| Zen Blue                                                            | Zeiss             | <a href="https://www.zeiss.com">https://www.zeiss.com</a>                                                              |
| FlowJo 10.4.1                                                       | FLOWJO            | <a href="https://www.flowjo.com">https://www.flowjo.com</a>                                                            |
| NeuroLucida                                                         | MBF bioscience    | <a href="http://www.mbfbioscience.com">http://www.mbfbioscience.com</a>                                                |
| DataWave SciWorks                                                   | DataWave          | <a href="http://www.dwavetech.com">http://www.dwavetech.com</a>                                                        |

**Table S2. Primers used in this paper, Related to Supplemental Experimental Procedures.**

| <b>Primers used for quantitative Real-Time PCR:</b> |                           |                           |         |
|-----------------------------------------------------|---------------------------|---------------------------|---------|
| Gene                                                | Sense (5'–3')             | anti-sense (5'–3')        | Species |
| TNFa                                                | ATGGCCTCCCTCTCATCAGT      | GTTTGCTACGACGTGGGCTA      | Mouse   |
| IL-1b                                               | CGCAGCAGCACATCAACAAG      | GTGCTCATGTCCCTCATCCTG     | Mouse   |
| IL-6                                                | ACCAGAGGAAATTTTCAATAGGC   | TGATGCACTTGCAGAAAACA      | Mouse   |
| IFNa                                                | GGACTTTGGATTCCCGCAGGAGAAG | GCTGCATCAGACAGCCTTGCAGGTC | Mouse   |
| IFNb                                                | TCCGAGCAGAGATCTTCAGGAA    | TGCAACCACCACTCATCTGAG     | Mouse   |
| IFNg                                                | GCTCTGAGACAATGAACGCT      | AAAGAGATAATCTGGCTCTGC     | Mouse   |
| iNOS                                                | TGGAGCGAGTTGTGGATTGTC     | CCAGTAGCTGCCGCTCTCAT      | Mouse   |
| H2-D1                                               | TCCGAGATTGTAAAGCGTGAAGA   | ACAGGGCAGTGCAGGGATAG      | Mouse   |
| H2-T23                                              | GGACCGCAATGACATAGC        | GCACCTCAGGGTACTTCAT       | Mouse   |
| Lig1                                                | GGGGCAATAGCTCATTGGTA      | ACCTCGAAGACATCCCTTT       | Mouse   |
| Fkbp5                                               | TATGCTTATGGCTCGGCTGG      | CAGCCTTCCAGGTGGACTTT      | Mouse   |
| S100a10                                             | CCTCTGGCTGTGGACAAAAT      | CTGCTCACAAGAAGCAGTGG      | Mouse   |
| CD14                                                | GGACTGATCTCAGCCCTCTG      | GCTTCAGCCCAGTGAAAGAC      | Mouse   |
| Ccl1                                                | CTTCAATCCTCCTCGACTGG      | TACGTCGGAGTTCAGCTGTG      | Mouse   |
| Cx3cr1                                              | CAGCATCGACCGGTACCTT       | GCTGCACTGTCCGGTTGTT       | Mouse   |
| Iba1                                                | CAGACTGCCAGCCTAAGACA      | AGGAATIGCTTGTTGATCCC      | Mouse   |
| CD11b                                               | TCCGGTAGCATCAACAACAT      | GGTGAAGTGAATCCGGAAC       | Mouse   |
| GFAP                                                | AATGACTCCTCCACTCCCTGC     | AGGAAGCGGACCTTCTCGATG     | Mouse   |
| SLC1A2                                              | GGAGTTCCTCAACATTCGTAAT    | AGATGCCCCCGTGAATGATGAG    | Mouse   |
| SLC1A3                                              | GTAAAGAGTTACCTGTTTCGGA    | CATGAGAAGCTCCCCAGGGAAC    | Mouse   |
| HPRT                                                | GCTGGTGAAAAGGACCTCT       | CACAGGACTAGAACACCTGC      | Mouse   |
| GAPDH                                               | GACAACCTTTGGCATGTGG       | ATGCAGGGATGATGTTCTG       | Mouse   |
| <b>Genotype primers:</b>                            |                           |                           |         |
| Mouse strains                                       | Forward (5'–3')           | Reverse (5'–3')           |         |
| Cx3CrCre+/-                                         | GATCCTGGCAAATTCGGCTA      | TTCCTGCATGACCGGTCGA       | Mouse   |
| tsc flox                                            | GTCACGACCGTAGGAGAAGC      | GAATCAACCCACAGAGCAT       | Mouse   |
| Cx3cr1-CreERT2                                      | AGCTCACGACTGCCTTCTTC      | ACGCCAGACTAATGGTGAC       | Mouse   |
|                                                     | GTAAATGACCTGCAGCCAAG      |                           |         |
